# Supplementary material for: Climate Model Downscaling in Central Asia: A Dynamical and a Neural Network Approach
Source: Copernicus journal article supplement (doi:10.5194/gmd-2023-227), 2023-12-05
Supplement: Supplementary file [file gmd-2023-227-AC2-supplement.pdf]

1 Dear Editor and Reviewers,

2 Many thanks for your valuable comments and suggestions, which were very useful for improving presentation of  
3 results and paper readability. In the following, we will answer all the comments raised by the reviewers in detail.  
4 The reviewers' comments are in bold, citations in *Italic* and our answers are in regular font.

## 5 **1 Reviewer 1:**

### 6 **1.1 General comments:**

7 **Overall, the authors present some interesting results that merit to be published. They explored a**  
8 **traditional method of downscaling and contrasted it with a more novel machine-learning approach,**  
9 **which is interesting and a hot topic in the field of climate modeling.**

10 We thank you for your positive and encouraging comments. We appreciate your effort to review our manuscript  
11 with such a detail and believe that your critics improved the results presented a lot. Especially, your many helpful  
12 comments in the PDF helped us to modify the text easily at the right position.

13 **The experiments and results only need minor modifications: the method needs more transparency**  
14 **and explanation of the authors' choices. Their experiments are not reproducible from their text but**  
15 **could be with some additional information.**

16 We agree on this point. We have moved the code and the description from GitHub to Zenodo, where it received  
17 a DOI and provided the input datasets as well as trained models there. Regarding the methodology, we have added  
18 two new schematic figures explaining the general work done in this manuscript and the architecture of the CNN used  
19 in the deep learning approach in details (new figures 1 and 2).

20 **The text needs major rewriting and restructuring as the manuscript sent for review really lacks**  
21 **quality. The manuscript still contains several typos, grammar errors, inconsistencies, missing refer-**  
22 **ences, and things in the wrong place. This manuscript did not read as "review ready," and it could**  
23 **have strongly benefitted from additional proofreading before sending it to reviewers. Furthermore,**  
24 **a sentence in the introduction was clearly copied from another website without credit. This is unac-**  
25 **ceptable and should not have happened, as it comes across as sloppy and unethical.**

26  
27 Thanks a lot for finding the similarity of the text which was ignored completely by the Copernicus software. We

28 removed it from the new version of the manuscript and tried to introduce CORDEX in a way that the similarity  
29 index is 0 to the one of their website and any published paper.

30

31 **Therefore, I advise the authors to thoroughly rewrite and clean their manuscript before sending**  
32 **it back for review.**

33

34 We have modified the manuscript and rewrote it according to your comments.

35 **Specific comments:**

36 **Answers to reviewing questions from Copernicus:**

37 **1- Does the paper address relevant scientific modeling questions within the scope of GMD? 2- Does**  
38 **the paper present a model, advances in modeling science, or a modeling protocol that is suitable for**  
39 **addressing relevant scientific questions within the scope of EGU? 3- Does the paper present novel**  
40 **concepts, ideas, tools, or data? Does the paper represent a sufficiently substantial advance in modeling**  
41 **science?**

42 **A1+2+3 together:** The paper presents the added value of dynamical downscaling precipitation  
43 from a GCM over Central Asia and compares it to emulating the RCM with a machine learning  
44 framework. Although statistical downscaling with machine learning has been done with precipitation  
45 (and other climate variables) before, it seems novel over Central Asia, and the authors make some  
46 interesting comparisons. I think the geoscience community can benefit from learning more about the  
47 benefits of these machine-learning models and how they compare to traditional techniques.

48 Thanks for the positive comments.

49 **4- Are the methods and assumptions valid and clearly outlined? 5- Are the results sufficient to**  
50 **support the interpretations and conclusions? 6- Is the description sufficiently complete and precise to**  
51 **allow their reproduction by fellow scientists (traceability of results)? In the case of model description**  
52 **papers, it should, in theory, be possible for an independent scientist to construct a model that, while**  
53 **not necessarily numerically identical, will produce scientifically equivalent results. Model development**  
54 **papers should be similarly reproducible. For MIP and benchmarking papers, it should be possible**  
55 **for the protocol to be precisely reproduced for an independent model. Descriptions of numerical**  
56 **advances should be precisely reproducible.**

57 **A4+5+6 together: At the current state of the manuscript no. The methods are not clearly**  
58 **outlined, the results need clarification and as it is, the experiments could not be reproduced by fellow**  
59 **scientists. But if the manuscripts are rewritten with the proposed corrections and feedback, I believe**  
60 **that it could be.**

61 We answered all specific detailed comments raised by you in the new version of the manuscript. We added 2 new  
62 figures only explaining the methodology. We re-plotted all the figures according to your comments. We checked the  
63 Zenodo Repository if one could reproduce the same results from scratch.

64 **7- Do the authors properly credit related work and clearly indicate their new/original contribution?**  
65 **A: No, at the current state of the manuscript, there is a copying problem from a website in the**  
66 **introduction that needs crediting or paraphrasing.**

67 As mentioned previously, we solved this.

68 **8- Does the title clearly reflect the contents of the paper? Yes.**

69 **9- Does the abstract provide a concise and complete summary? Yes.**

70 **10- Is the overall presentation well-structured and clear? A: No. The majority of sections need**  
71 **restructuring and rewriting to make it clear.**

72 We have restructured and rewrote a large portion of the manuscript.

73 **11- Is the language fluent and precise? A: No. There are typos and grammar errors that need to**  
74 **be corrected.**

75 Done.

76 **12- Are mathematical formulae, symbols, abbreviations, and units correctly defined and used?**  
77 **A: No, equation 1 needs verification. There is also a lack of consistency for acronyms across the**  
78 **manuscript.**

79 Done.

80 **13- Are the number and quality of references appropriate? Yes.**

81 **Is the amount and quality of supplementary material appropriate? For model description papers,**  
82 **authors are strongly encouraged to submit supplementary material containing the model code and**  
83 **a user manual. For development, technical, and benchmarking papers, the submission of code to**  
84 **perform calculations described in the text is strongly encouraged. A: Yes.**

85 **Section by section:**

86 **Abstract:** Overall, you wrote a good abstract. It generally reads well and gives a good overview,  
87 but it needs some clarifications and minor changes.

88 Done.

89 **Introduction:**

90 • **Acronyms:** Your text has many acronyms; this weighs down the text and makes it hard to  
91 read. Some are used only once or twice, so I suggest you remove those and keep only essential  
92 acronyms. There is also the problem of using acronyms before they are defined (usually, only  
93 later in the text); that should be corrected.

94 Done.

95 • **Structure:** The introduction feels scattered and all over the place. Information is repeated, and  
96 some paragraphs talk about different subjects. Some paragraphs also contain sentences that feel  
97 out of place and should be in another place (highlighted in the annotated pdf). The introduction  
98 needs to be rewritten and restructured so that similar information is not repeated and appears  
99 in the same place in the text.

100 According to your annotated PDF, we have changed the introduction a lot! We removed unnecessary informa-  
101 tion and focused on two main scientific questions presented by bullet points in the introduction.

102 • **Quality:** the sentence on lines 55-57 was clearly copied from the Cordex website (see annotated  
103 pdf). The two sentences (from your text and the Cordex website) have a Jaccard similarity  
104 index of 0.69, but it was not picked up by Copernicus' similarity report. This is unacceptable  
105 and very sloppy. You should modify this immediately so that you paraphrase it in a way that is  
106 not just a copy.

107 We modified this part and checked the similarity index with an online software. We have reached 0% similarity  
108 in the new version of the manuscript.

109 **Data and methods:**

110 • **Overall,** this section needs restructuring and rewriting. There are inconsistencies, and quite a  
111 few pieces of information need to be included or clarified. You might understand your setup very

112 well, but it's hard to follow exactly what you've done for a new reader, creating a transparency  
113 problem.

114 We absolutely agree on this. We hope with the new schematics and explanations, especially the added parts  
115 on the CNN, we reached a quit good level of the transparency.

- 116 • **The CNN section particularly needs considerable rewriting and more information about your**  
117 **choice of the framework (i.e., what's the perfect and imperfect framework and why did you**  
118 **choose the imperfect over perfect one), the selection of training/validation/testing data (and**  
119 **why), and the different models (HCL, No-CL, SCL) you created (see annotated pdf for more**  
120 **details). Things from the appendix need to be in the CNN section, and your different CNN**  
121 **setups (NoCL, etc.) must be clearly defined there. I think it's also missing a figure for the**  
122 **architecture, and readers would benefit from seeing it in your manuscript instead of having to**  
123 **look it up in another paper.**

124 Thanks to your annotated PDF, we implemented the missing information and clarified this part in the new  
125 version of the manuscript.

- 126 • **You should also consider what your target audience will be for this paper. Because you aim for**  
127 **a geoscience journal, its readers might not necessarily be familiar with many machine learning**  
128 **terms and might need more background information. I think your paper might benefit from more**  
129 **explanations like: why did you choose to use a CNN instead of another architecture? What are**  
130 **its advantages? Why did you choose to train it in this way?**

131 we added the following paragraph to the introduction :

132 "CNN can recognize and encode spatial hierarchies in data (Zhu et al., 2017), making them exceptionally suit-  
133 able for geospatial data, which is fundamental in climate modelling. Unlike traditional statistical methods that  
134 often require manual selection and careful engineering of features, CNN automatically learns the most predic-  
135 tive features directly from the data (Reichstein et al., 2019). CNN can model complex non-linear relationships  
136 between input data and outputs, often present in climate data due to intricate interactions in weather systems.  
137 CNN is generally more straightforward and efficient for tasks that aim to predict or classify based on patterns  
138 distributed across the spatial domain, such as temperature or precipitation patterns in climate models (Racah  
139 et al., 2017). CNN is adept at maintaining spatial coherence in the output, which is critical in downscaling

140 where preserving the geographical patterns of climate variables (like precipitation) is crucial (Kurth et al.,  
141 2018).”

142 and we have added some details on our choice of CNN in the new version of the manuscript.

### 143 **Results:**

- 144 • **Overall, your results are interesting, and you conducted some good experiments for your RCM  
145 and CNN emulator. For example, I think it’s great that you also tested your CNN emulator  
146 on a new GCM. However, the way you present your results needs more transparency. Some  
147 figures would benefit from additional information to be clearer (see annotated pdf). Also, your  
148 interpretations rely greatly on seeing “by eye” how different the patterns are and how well  
149 the emulator reproduces the RCM. Some of them also come across as vague and unconvincing.  
150 Adding a quantitative value to this (for example, spatial means and std of AV or MAE) could  
151 add weight to your arguments.**

152 We re-plotted all the figures to meet your critics. We also added one additional figures showing simple biases  
153 along with the MAE. The boxplots are thought to present the quantitative values, which resent medians and  
154 standard deviations.

- 155 • **Quality: This section also needs rewriting. Some things need to be put in the right place, lack  
156 transparency, a reference is missing (? from Latex), and there are inconsistencies in notations.**

157 Thanks to your detailed critics, we have done many corrections on these points.

- 158 • **Question to the authors: From what I understood, you ran your CNN over a dataset that com-  
159 bines the historical period and different SSPs. In the hypothesis that you randomly distributed  
160 your training and testing data, have you evaluated whether the CNN tests differently over the  
161 three SSPs? One thing to do, for example, that could have been done to test generalization, for  
162 example, could have been to train the CNN on historical + two SSPs and then test it on an  
163 unseen SSP.**

164 Yes, we shuffled the data. Our motivation was to train the CNN on as many situations as possible. We wished  
165 to have different scenarios and find the mapping in many different forcings. However, in the generalization  
166 part, meaning, applying on a new GCM, we only did it on one SSP (SSP370). One reason, why we did not

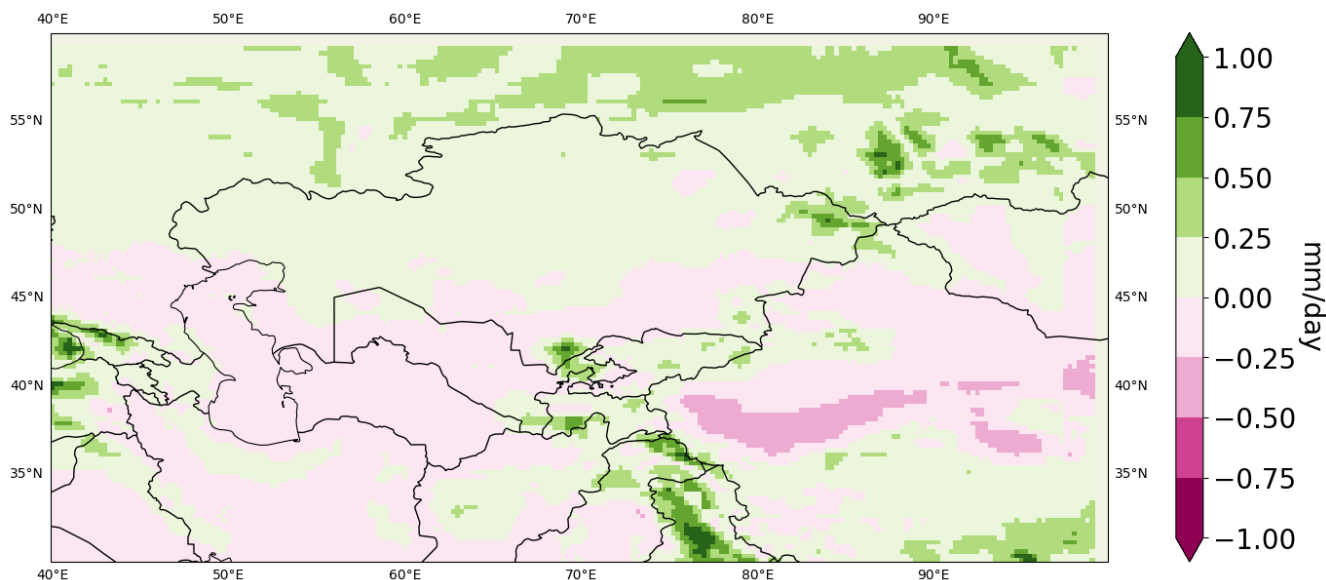

Figure 1: Added Value [mm/day] for the CNN with SSP370 scenario excluded from training.

167 test the setting you proposed, was that if we leave one SSP aside, then we will reduce the size of training set  
 168 by almost 30% and we already are at the limits of sample size for deep learning. One possible solution for that  
 169 might be to redo all the experiences with 3-hourly model output, which is available in our RCM output. Then  
 170 we might have more data available for training.

171 For the sake of curiosity, we have followed your generalization suggestion and excluded the SSP370 from the  
 172 training and the calculated the trained model's MAE on the simulation under SSP370. The AV pattern (Figure  
 173 1) looks very similar to the one from the previous model. However, negative AV values are a bit larger than  
 174 the other CNN.

175 We inserted this result in the new version of the manuscript as a kind of generalization test on different forcing.  
 176 This additional test is actually a very interesting approach of generalization. Thanks again for the comment.

177 On behalf of all authors,  
 178 Bijan Fallah

## References

- 179
- 180 Kurth, T., Treichler, S., Romero, J., Mudigonda, M., Luehr, N., Phillips, E., Mahesh, A., Matheson, M., Deslippe,  
181 J., Fatica, M., et al.: Exascale deep learning for climate analytics, in: SC18: International conference for high  
182 performance computing, networking, storage and analysis, pp. 649–660, IEEE, 2018.
- 183 Racah, E., Beckham, C., Maharaj, T., Ebrahimi Kahou, S., Prabhat, M., and Pal, C.: Extremeweather: A large-  
184 scale climate dataset for semi-supervised detection, localization, and understanding of extreme weather events,  
185 Advances in neural information processing systems, 30, 2017.
- 186 Reichstein, M., Camps-Valls, G., Stevens, B., Jung, M., Denzler, J., Carvalhais, N., and Prabhat, f.: Deep learning  
187 and process understanding for data-driven Earth system science, Nature, 566, 195–204, 2019.
- 188 Zhu, X. X., Tuia, D., Mou, L., Xia, G.-S., Zhang, L., Xu, F., and Fraundorfer, F.: Deep learning in remote sensing:  
189 A comprehensive review and list of resources, IEEE geoscience and remote sensing magazine, 5, 8–36, 2017.



# Climate Model Downscaling in Central Asia: A Dynamical and a Neural Network Approach

Bijan Fallah<sup>1</sup>, Christoph Menz<sup>1</sup>, Emmanuele Russo<sup>2</sup>, Paula Harder<sup>3</sup>, Peter Hoffmann<sup>1</sup>, Iulii Didovets<sup>1</sup>, Masoud Rostami<sup>1,5</sup>, and Fred F. Hattermann<sup>1,4</sup>

<sup>1</sup>Potsdam Institute for Climate Impact Research (PIK), P.O. Box 601203, 14412 Potsdam, Germany

<sup>2</sup>ETH Zürich, Department of Environmental Systems Science, Universitätstrasse 16, 8092 Zürich, Switzerland

<sup>3</sup>Mila Quebec AI Institute, Montreal, Canada

<sup>4</sup>Eberswalde University for Sustainable Development (HNEE), Germany

<sup>5</sup>Laboratoire de Météorologie Dynamique (LMD), Sorbonne University (SU), Ecole Normale Supérieure (ENS), Paris, France

**Correspondence:** Bijan Fallah (fallah@pik-potsdam.de)

**Abstract.** To estimate future climate change impacts, usually high-resolution climate projections are necessary. Statistical and dynamical downscaling or a hybrid of both methods are mostly used to produce input datasets for impact modelers. In this study, we use the regional climate model (RCM) COSMO-CLM (CCLM) version 6.0 to identify the added value of dynamically downscaling a general circulation model (GCM) from the sixth phase of the Coupled Model Inter-comparison Project (CMIP6) and its climate change projections' signal over Central Asia (CA). We use the MPI-ESM1-2-HR (at 1° spatial resolution) to drive the CCLM (at 0.22° horizontal resolution) for the historical period of 1985-2014 and the projection period of 2019-2100 under three different shared socioeconomic pathways (SSPs): SSP1-2.6, SSP3-7.0 and SSP5-8.5 scenarios. Using the Climate Hazards Group InfraRed Precipitation with Station data (CHIRPS) gridded observation dataset [as reference](#), we evaluate the ~~CCLM performance over the historical period using a simulation performance of CCLM~~ driven by ERAInterim reanalysis [over the historical period](#). CCLM's added value, compared to its driving GCM, is significant ([more than 5mm/day](#)) over CA mountainous areas, which are at higher risk of extreme precipitation events. ~~Furthermore, we downscale the CCLM for~~ [Additionally, we employ the CCLM to refine](#) future climate projections. We present high-resolution maps of heavy precipitation changes based on CCLM and compare them with CMIP6 GCMs ensemble. Our analysis shows a significant increase in heavy precipitation intensity and frequency over CA areas that are already at risk of extreme climatic events in the present day. Finally, ~~applying our single model high-resolution dynamical downscaling,~~ we train a convolutional neural network (CNN) to map ~~the low-resolution GCM simulations to the~~ [a GCM simulation to its](#) dynamically downscaled CCLMones. We show that ~~applied~~

the CNN could emulate the GCM-CCLM model chain over large CA areas. However, this specific emulator has shortcomings. This emulator has added values when applied to a new GCM-CCLM model chain. Our downscaling data and the pre-trained CNN model could be used by scientific communities interested in downscaling CMIP6 models and searching for a trade-off between the could use our downscaling data. The CNN architecture can be applied as an alternative to dynamical and statistical methods.

## 1 Introduction

It is very well acknowledged that the The increasing global mean temperature is increasing due to anthropogenic greenhouse gas emissions (Allan et al., 2021). The most critical presents a significant challenge for society is to assess and predict the future impact of this warming on the, requiring the assessment and prediction of future impacts on human health, natural ecosystems, and economy for economies across different regions of the World. Studies of world (Allan et al., 2021). Regional studies on vulnerability, impacts and adaptation at the regional scale require, and adaptation necessitate reliable high-resolution climate projections (Maraun et al., 2015), which are based on dynamical downscaling through RCMs (Rummukainen, 2010; Feser et al., 2014) typically achieved through dynamical downscaling via Regional Climate Models (RCMs) (Rummukainen, 2010; Feser et al., 2011), statistical techniques (Fowler et al., 2007) or hybrid approaches using both (Meredith et al., 2018; Laflamme et al., 2016) (Maraun and Widmann, 2018; Fowler et al., 2007), or a hybrid of both approaches (Maraun et al., 2015; Meredith et al., 2018; Laflamme et al., 2016).

Countries should develop an adaptation and mitigation strategy to cope with potential future risks of climate change. Usually, climate projections are used as the basis for decision-making in spending financial resources on infrastructure, society, and environments (Maraun et al., 2015). Central Asia (CA) is assumed to be, recognized as one of the most vulnerable regions to climate change impacts. CA's water resources depend on water, is heavily dependent on water resources from glaciers and rivers that are shrinking due to rising temperatures and decreasing precipitation (Reyer et al., 2017). Food security is at severe risk in CA with reduction of crop yields due to climate change (Allan et al., 2021). Extreme (Reyer et al., 2017; Fallah et al., 2023; Didovets et al., 2023). The area faces significant challenges to food security, characterized by declining crop yields and an increased occurrence of severe and frequent extreme weather events like floods and landslides are happening more frequently and intensively in the region leading to severe damage to infrastructures, livelihoods and crops, subsequently causing. These conditions damage infrastructure, livelihoods, and agriculture, resulting in population displacement and migration (Reyer et al., 2017) (Allan et al., 2021; Reyers et al., 2021).

Given the above-mentioned Despite these critical concerns, the impact modelling is still hindered in CA, based on the lack development of high-resolution climate projections but also on the elevated level of uncertainty in CA is impeded by the significant uncertainties inherent in the existing high-resolution observational and reanalysis datasets. Motivated by these challenges, in this manuscript we produce a dynamically downscaled state of the projected climate over CA from a single GCM of the (Fallah et al., 2016a). Dynamical downscaling of CMIP6 project. In some cases, for properly reproducing models for the CA region is vital for accurately simulating extreme convective precipitation events and local topographical

50 effects, downscaling is essential for representing local dynamics (Kendon et al., 2014; Demory et al., 2020). Various factors, such as, which are influenced by the orography of the region, ~~the~~ large-scale atmospheric circulation, ~~the~~ and sea surface temperature anomalies in ~~Indian Oceans~~ the Indian Ocean and the Pacific, ~~and the soil moisture feedback influence convective precipitation events in central Asia (Xu et al., 2022).~~ The main goal of dynamical downscaling is to improve (Kendon et al., 2014; Demory et al., 2020; Xu et al., 2022). Dynamical downscaling enhances the resolution of a driving Global  
55 ~~Circulation Model (GCM) and produce a robust~~ GCM and produces a robust, physically consistent regional state of the climate. ~~This is often considered a critical point for preferring the use of RCMs to~~ High-resolution atmospheric models have been shown to have better skills over complex topographies in estimating variables like precipitation than in situ observations, satellite-derived and radar datasets (Lundquist et al., 2019). Many studies confirm that RCMs can better represent small-scale atmospheric features, especially for precipitation over complex topographies (Ban et al., 2015; Wang et al., 2013; Frei et al., 2003)  
60 This method is often preferred over statistical downscaling approaches ~~that rely on the assumption that statistical relationships found for the present also hold true for the future.~~ Dynamical downscaling reproduce a wide range of local physical processes, especially important for the representation of precipitation (Hess et al., 2022). Traditional statistical downscaling approaches are based on model output statistics and try to improve the spatial resolutions based on statistical relationships and not dynamical processes (Hess et al., 2022; Lange, 2019). The resulting statistically downsealed data usually lacks physical consistency  
65 and might be too smooth (Lange, 2019; Fallah et al., 2023). ~~On the other hand,~~ which assume that present statistical relationships will hold in the future (Hess et al., 2022). However, RCMs are computationally demanding, ~~especially at the very high resolutions useful for impact studies. At the same time, they suffer from~~ and inherit a 'cascade' of uncertainties that must be taken into account prior to the performance of climate projections. In order to improve the models inter-comparability and to provide a robust, validated benchmark for the performance of high-resolution climate projections using RCMs, ~~over the~~  
70 ~~years members from different~~ of uncertainty', meaning that the uncertainties in the models will expand from one step or chain to another, highly affecting RCM outcomes and must be considered prior to performing climate projections (Mitchell and Hulme, 1999; Sørland  
. Despite these considerations, the added value of RCMs concerning their driving GCM is constantly debated in the community and is highly dependent on the driving GCM (Jacob et al., 2012; Lenz et al., 2017; Fotso-Nguemo et al., 2017; Di Luca et al., 2012, 2015)  
. An RCM is tuned to perform over the target local region. However, a GCM is tuned to represent energy and water balance  
75 globally (Sørland et al., 2018).

Various international institutions have ~~joined forces into~~ collaborated within the Coordinated Regional Climate Downscaling Experiment (CORDEX) :-

~~CORDEX is a program sponsored by the World Climate Research Program (WCRP) aimed at developing an improved framework for generating regional-scale climate projections for impact assessment and adaptation studies worldwide within to~~  
80 address these issues and improve the models' inter-comparability. CORDEX aims to create a better framework for producing climate projections at a regional scale that is suitable for impact evaluation and adaptation planning globally, aligned with the timeline of the Intergovernmental Panel on Climate Change Sixth Assessment Report (Kikstra et al., 2022) ~~timeline and beyond.~~ CORDEX aims to produce regional climate projections and to evaluate their performance through different experiments. The usage of CORDEX-like simulations must be adapted to the needs of the impact modelling. CORDEX data are often affected

85 by diverse sources of uncertainty: systematic biases in the driving GCM and RCM itself, uncertainty in scenarios, the model internal variability, model-specific response to driving GCM's boundary forcing and a small population of RCM simulations. We might underestimate/overestimate the uncertainty if the sample is too small (Hewitson et al., 2014).

Unfortunately, most of the research conducted in/for the CORDEX initiative. However, most CORDEX research focuses on highly industrialized countries (Allan et al., 2021), and fewer institutes run RCM simulations over CA (refer to ). Sadly, 90 the developing countries (CA included) are the ones who will suffer the most from the consequences of global warming (Naddaf, 2022). In particular, only two CORDEX model simulations are available to date for CA, driven by the fifth phase of the coupled model intercomparison project (CMIP5) GCMs (Taylor et al., 2012). On the other hand, no (Allan et al., 2021; Taylor et al., 2012). No simulation (except this study) driven by the CMIP6 model simulations has been planned so far for CA CORDEX-CA (see [https://wcrp-cordex.github.io/simulation-status/CMIP6\\_downscaling\\_plans.html](https://wcrp-cordex.github.io/simulation-status/CMIP6_downscaling_plans.html), last visited on 14.08.2023). One motivation 95 to conduct dynamical downscaling, especially over areas with complex topography, as in CA, is that high-resolution atmospheric models have been shown to have better skills in estimating variables like precipitation than in situ observations, satellite-derived and radar datasets (Lundquist et al., 2019). Many studies confirm that RCMs can better represent small-scale atmospheric features, especially for precipitation over complex topographies (Ban et al., 2015; Frei et al., 2003).

Despite these considerations, the added value of RCMs concerning their driving GCM is constantly debated in the community 100 and is highly dependent on the driving GCM (Jacob et al., 2012; Lenz et al., 2017; Fotso-Nguemo et al., 2017; Di Luca et al., 2012, 2015). An RCM is tuned to perform over the target local region. However, a GCM is tuned to represent energy and water balance globally (Sørland et al., 2018). Additionally, there is a debate in the community on whether the GCM-RCM chain might suffer from a "cascade of uncertainty", meaning that the uncertainties in the models will expand from one step or chain to another (Mitchell and Hulme, 1999; Sørland et al., 2018), highly affecting RCM outcomes. A significant advantage of the 105 high-resolution RCMs is the use of high-resolution surface forcings like the topography, land use and land cover, soil type, and coastlines (Hong and Kanamitsu, 2014).

Here, we focus on the added value of the dynamical downscaling for precipitation. Precipitation is one of the most critical variables in vulnerability, impacts and adaptation studies (Jacob et al., 2012). Mountain precipitation is especially vital for studying floods and water availability in the field of hydrology (Smith et al., 2010). Extreme daily precipitation is one of the 110 primary triggers of landslide events in CA, especially in Tajikistan and Kyrgyzstan (Wang et al., 2021). On the other hand, precipitation simulation is challenging for any climate model (Russo et al., 2019). RCMs have been shown to potentially add value in simulating mesoscale convective precipitation, coastal rainfall, and extreme rainfall events (Giorgi and Gutowski Jr, 2015; Russo et al., 2019) (Russo et al., 2019). Climate projections might be sensible to different parameter settings, emphasizing the need for careful calibration and validation of regional models. Dynamical downscaling's added value lies in its ability to tailor climate projections more closely to regional specifics, thereby improving the utility of climate data for regional climate change impact assessments

(Russo et al., 2020). Despite some systematic biases, dynamical downscaling consistently provides high-quality datasets that accurately describe the climatology of all climate variables in CA (Qiu et al., 2022).

In recent years, machine learning (ML) approaches like convolutional neural network (CNNs) have emerged as a promising statistical downscaling tool due to their ability to learn. Beyond dynamical methods, recent developments in machine learning, including CNNs as the most popular choice, offer promising and potentially transformative avenues for statistical downscaling (Harder et al., 2023; Rampal et al., 2024). CNNs have proven effective in numerous earth science disciplines besides downscaling, such as classification (Gardoll and Boucher, 2022), segmentation (Galea et al., 2024) and prediction (Watson-Parris et al., 2022) thanks to their capacity to extract features from spatial data and capture/identify non-linear mappings/relationships between inputs and outputs (Sun and Lan, 2021). Unlike the point-wise approaches, they apply an image-to-image translation which might reduce the spatial intermittency problems of post-processing methods (Rasp and Lerch, 2018). CNNs have been successfully applied to various tasks in computer vision, natural language processing, and image super-resolution. In climate science, CNNs have been used for statistical downscaling of temperature and precipitation over different regions and time scales, using distinct types of predictors and predictands (Baño-Medina et al., 2021; Serifi et al., 2021; Yang et al., 2023; Sun and Lan, 2021; Hess et al., 2022). Super-resolution (SR) in ML tries to increase the resolution of images or videos and preserve their content and details. The task is challenging because SR involves recovering high-frequency information lost or degraded in low-resolution images or videos (Dong et al., 2015). ML can generate high-resolution data that looks realistic and has good accuracy in prediction. However, when ML is applied to a physical system like the Earth's atmosphere, it may face a significant challenge: the predicted output values may need to obey physical laws such as energy, momentum, and mass conservation. These violations of constraints can be harmful—causing errors that may accumulate as climate models iteratively run on their own output (Harder et al., 2022). If there exists a physical relationship between low-resolution,

CNNs can recognize and encode spatial hierarchies in data (Zhu et al., 2017), making them exceptionally suitable for geospatial data, which is fundamental in climate modelling. Unlike traditional statistical methods that often require manual selection and careful engineering of features, CNN automatically learns the most predictive features directly from the data (Reichstein et al., 2019). CNNs can model complex non-linear relationships between input data and high-resolution datasets via some equations, one could enforce physical constraints between the datasets. This could be achieved by adding a constraint layer at the end of a neural network architecture (Harder et al., 2022). Therefore, we could guarantee that we employ physical constraints (like mass and energy conservation) in the prediction. However, in the GCM-RCM chain, unlike many statistical methods that try to re-distribute the precipitation amount from a coarse grid box to nested finer ones (Lange, 2019), precipitation might not follow the mass conservation. The RCM has its internal variability and leads information from a GCM only at its boundaries. In an unconstrained set-up, a CNN might be able to learn the hidden physical mappings between the RCM and its driving GCM. Therefore, we will explore both the outputs, often present in climate data due to intricate interactions in weather systems. CNNs are generally more straightforward and efficient for tasks that aim to predict or classify based on patterns distributed across the spatial domain, such as temperature or precipitation patterns in climate models (Racah et al., 2017). CNNs are adept at maintaining spatial coherence in the output, which is critical in downscaling where preserving the geographical patterns of climate variables (like precipitation) is crucial (Kurth et al., 2018). Constrained CNNs integrate physical

constraints or laws directly into the training process. The constraining is done by changing the loss function or the network's architecture to enforce compliance with physical laws (i.e., conservation of mass, energy, or momentum). Unconstrained CNNs operate without explicitly incorporating physical laws or constraints into the network's architecture or loss functions. They focus solely on learning from the input data to the output predictions based on the data-driven patterns they detect. This study explores unconstrained and constrained CNN approaches ~~to understand their effectiveness in downscaling and how they perform when applied to GCMs on which they were not initially trained.~~

The research questions guiding this study are:

- ~~– Research Question 1: How effectively can CMIP6 models be downscaled for the CORDEX Central Asia region to enhance precipitation simulations?~~
- ~~– Research Question 2: Can convolutional neural networks (CNNs) effectively downscale GCM outputs, and how do they perform when applied to GCMs they were not initially trained on?~~

~~Our final goal is to explore a hybrid framework using dynamical downscaling and deep learning to enhance the spatial resolution of GCM-like climate datasets. The tested methodology could be easily and rapidly applied to new climate datasets. Since the dynamical downscaling approaches have high computational costs and require hardware capacities (thousands of central processing units), scientists, especially impact modelers, must find trade-offs between the dynamically constraint and statistical downscaling methods. Therefore, our study would be a good starting point to test the idea of training the CNN on the dynamical chain of a single GCM-RCM to find physical relationships between the coarse state of a GCM and the finer state of an RCM. By finding an emulator for a specific GCM-RCM chain, we could apply it to different time periods and forcings, but for the same GCM. Therefore, the~~ manuscript will focus on three main topics: 1-added value of CCLM for the representation of precipitation over CA, 2-dynamical downscaling signal of CCLM for heavy precipitation and 3-training a CCLM emulator using a CNN. We present data and methods in section 2. The results of dynamical and hybrid downscaling are introduced in section 3 and 4, respectively. Finally, we discuss the results and draw conclusions in section 5.

## 2 Data and methods

~~The schematic shown in figure 1) depicts the methodology used in this study. In the following we will explain it in more details.~~

### 2.1 Employed Models and Experimental Setups

#### 2.1.1 RCM

In our study, we conduct a series of simulations with the COnsortium for Small scale Modelling in CLimate Mode (~~COSMO-CLM~~CCLM) RCM. ~~COSMO-CLM~~CCLM is a regional climate model developed by the German Weather Service (DWD) and the German Climate Computing Center (Deutsches Klimarechenzentrum, DKRZ) ~~in Germany (Roedel and Geyer, 2008)~~ from the COSMO

numerical weather prediction model ([Rockel and Geyer, 2008](#)), widely used for short-term weather forecasting. The original  
185 core of COSMO-CLM or CCLM, was called Local Model (LM), developed by DWD for weather forecasting. The adopted  
LM version for climate purposes formed the ~~COSMO-CLM~~ ([Böhm et al., 2003](#)). ~~COSMO-CLM~~ ~~CCLM~~ ([Böhm et al., 2003](#))  
. ~~CCLM~~ is designed to simulate the regional climate at high spatial resolution, allowing researchers to study various aspects  
of the climate system, such as temperature, precipitation, and extreme events. CCLM has been utilized in numerous studies  
to evaluate the impact of climate change on various regions, including Europe ([Russo et al., 2021](#)), Africa (Panitz et al., 2014;  
190 Dosio and Panitz, 2016), and Asia (Jacob et al., 2014; Kotlarski et al., 2014; Wang et al., 2013). It has also been used for climate  
projection studies and to assess the effectiveness of climate adaptation and mitigation strategies. The model has been thoroughly  
evaluated and validated ([Russo et al., 2019](#); [Kjellström et al., 2011](#)) ([Fallah et al., 2016b](#); [Russo et al., 2019](#); [Kjellström et al., 2011](#))  
. Its ability to produce realistic simulations of the current climate and its variability has made it one of the most widely used  
regional climate models in the scientific community (Sørland et al., 2021).

195 For our experiments, we ~~have~~ used a similar model set-up as the "optimal" set-up provided in the study of Russo et al.  
(2019). ~~We set up our simulations in accordance with CORDEX.~~ The CORDEX protocol requires a set of simulations that  
can be divided into two main groups. The first one, referred to as the evaluation run, consists of a single model experiment  
performed over the period 1979-2014, using ERAInterim at a spatial resolution of T255 ( $\sim 0.7^\circ$ ) as the driving data. In the  
second stream (projection), the models must run with boundary conditions from GCMs of the CMIP6 project for the period  
200 1950-2100 under different SSPs (here, we have chosen a single GCM: MPI-ESM1-2-HR [and SSP126, SSP370 and SSP585](#)  
[scenarios](#)). SSPs are baseline scenarios describing the future development pathways depending on population, technology and  
economic growth, urbanization, investment in healthcare and education, land use and energy (Riahi et al., 2017).

We have chosen the two available CORDEX-CA evaluation simulations from other models, driven by ERAInterim at  $0.22^\circ$   
horizontal resolution, for comparison/evaluation of our RCM simulations, which are driven by ERAInterim for the evaluation  
205 period. The two simulations are 1) ERAInterim-RMIB-UGent-ALARO-0 (Giot et al., 2016) and 2) ERAInterim-GERICS-  
REMO2015 (Jacob and Podzun, 1997; Fotso-Nguemo et al., 2017).

### 2.1.2 ~~CNN~~CNNs

We create an emulator of CCLM using [a](#) CNN. We use the output of the ~~COSMO-CLM~~ ~~CCLM~~ Version 6.0 RCM, which is  
driven by the MPI-ESM1-2-HR GCM under four different scenarios ~~:historical, SSP126, SSP370 and SSP585~~ ([for 2019-2100](#)).  
210 Historical is based on the data of greenhouse gas levels, land use, and other climate forcings from 1850 to 2014 that were  
observed. SSP126 (~~Shared Socioeconomic Pathway 1 – RCP2.6~~) represents a "green" future where global resources are pro-  
tected, human well-being is improved, and income gaps are narrowed. This scenario has low challenges to adaptation and low  
greenhouse gas emissions. [Challenges to adaptation refer to the degree of difficulty that societies might face in adjusting to](#)  
[the environmental, economic, and social impacts of climate change. Specifically, this term refers to a society's fundamental](#)  
215 [susceptibility and the accessibility and efficacy of technologies and approaches designed to lessen the impacts of climate](#)  
[change. The adaptation challenges are minimal in the SSP126 scenario, which envisions a sustainable future. This implies](#)  
[that, under this scenario, global cooperation and sustainable practices lead to advancements in technology and governance](#)

that significantly reduce vulnerability to climate change impacts. Additionally, societal structures are resilient, and resources are managed to minimise environmental stresses and maximise human well-being. SSP370 (~~Shared Socioeconomic Pathway 3--RCP7~~) depicts a regional rivalry future where nationalism and regional conflicts prevail, global issues are ignored, and inequality is increasing. This scenario has high challenges to adaptation and high greenhouse gas emissions. SSP585 (~~Shared Socioeconomic Pathway 5--RCP8.5~~) portrays a fossil-fueled development future where global markets are connected, technological progress is fast, but environmental policies are weak. This scenario has low challenges to adaptation and very high greenhouse gas emissions. As an additional dataset, we merge the ERA-Interim reanalysis and CCLM simulation driven by it (ERAInterim-CCLM) to our previous ~~simulations~~ data pool of GCM and RCM (see Fig. 1). We then train our CNN model based on the architecture proposed by ~~Harder et al. (2022)~~ Harder et al. (2023), which can incorporate physical constraints to ensure mass conservation and energy balance. We evaluate our model in the CA domain. ~~Using the GCM as low-resolution data may introduce biases and errors in the downscaling process because the GCM may not capture the regional features and variability of the climate system accurately (Xu et al., 2021; Chokkavarapu and Mandla, 2019). RCM itself is prone to different biases. Therefore, we have both an imperfect input and imperfect output. Upscaling the RCM (the so-called perfect model experiment) may reduce these biases and errors because the RCM can better represent the regional climate characteristics and feedbacks (Muttaqien et al., 2021). However, we are interested in the so-called~~ We have to note that we use not the whole GCM domain as input for the CNN but only the domain covering the CA (Fig. 3).

In the context of deep learning for climate modelling, the 'perfect model' approach involves starting with high-resolution data, which is considered accurate or nearly perfect, and intentionally degrading it to a lower resolution. The aim is to simulate a scenario where the 'truth' (the original high-resolution data) is known, and then to recover this high-resolution from the artificially degraded data using deep learning techniques. This approach is a crucial part of training, as it teaches the model the desired mapping from low to high resolution, enabling the model to effectively learn how to upscale or enhance resolution while minimizing the loss of critical information. It's a controlled experiment that helps refine the model's capabilities.

The "imperfect model" ~~set-up (Stengel et al., 2020; Leinonen et al., 2020), where the dynamical mapping from GCM to RCM is of higher interest.~~ approach, on the other hand, acknowledges that both the low-resolution (GCM output) and the high-resolution (RCM output) datasets have their inherent errors and limitations. In this scenario, we do not have a single source of truth but rather two separate sets of data:

- ~~Low-resolution data: This may capture global or large-scale phenomena but miss regional details (Xu et al., 2021; Chokkavarapu and~~
- ~~High-resolution data: This provides detailed regional information but may still have errors or not perfectly reflect reality due to limitations in data collection, model configuration, or computational constraints (Muttaqien et al., 2021).~~

In this setup, the challenge for deep learning is to learn a mapping between these two independently imperfect data sets. With using the CNN we try to train a model that can predict high-resolution details from low-resolution inputs as accurately as possible despite the absence of a perfect ground truth. This involves understanding and modeling the uncertainties and biases inherent in both datasets.



Many regions of CA receive low precipitation throughout the year and the spatio-temporal variability of precipitation is large. One needs a large dataset of GCM output and the corresponding RCM with various precipitation patterns for training a CNN to find an RCM emulator that captures the mapping from GCM to RCM.

255 ~~We~~ First, the daily datasets are shuffled randomly. We then have used a total number of 68141 (60%), 22714 (20%) and 22714 (20%) RCM simulation days for training, ~~testing and evaluation~~ validation and testing, respectively. The low-resolution (GCM) and high-resolution (RCM) datasets ~~(GCM)~~ have  $30 \times 60$  and  $120 \times 240$  grid points over latitudes and longitudes, respectively. Therefore, the downscaling factor (N) is 4 in this case. For a complete explanation of the CNN architecture, we refer to the work of ~~Harder et al. (2022)~~ Harder et al. (2023) and the corresponding ~~GitHub repository at~~ Zenodo repository at  
260 https://zenodo.org/records/8150694 (last visited on 21st of June 2023). ~~Here, we briefly explain the architecture of the CNN used~~

Figure 2 shows the schematic of the standard CNN (without constraint layers) architecture used for two times up-sampling in this study:-

. We briefly explain the steps shown in the schematic:

- 265
- ~~The input layer is a low-resolution (LR) image of size  $30 \times 60$  with only one channel, i. e., precipitation value in mm/day.~~ Conv (Convolutional Layer): Initially, these layers help in extracting various levels of features from the low-resolution images, such as edges, textures, and other relevant image details.
  - ~~The first layer is a convolutional layer with 64 filters of size  $3 \times 3 \times 1$  and stride 1. The output is a feature map of size  $30 \times 60 \times 64$ .~~ ReLU (Rectified Linear Activation Unit): This non-linear activation function is a key player in our model's  
270 learning process. It introduces non-linearity, outputting the input directly if it's positive; otherwise, it outputs zero. This intriguing function helps the network learn complex patterns efficiently.
  - ~~The second layer is a sub-pixel convolutional layer with 256 filters of size  $3 \times 3 \times 64$  and stride 1. The output is a feature map of size  $60 \times 120 \times 64$ .~~
  - ~~The third layer is another sub-pixel convolutional layer with 256 filters of size  $3 \times 3 \times 64$  and stride 1. The output is a~~  
275 ~~feature map of size  $120 \times 240 \times 64$ .~~
  - ~~The fourth layer is a convolutional layer with 1 filter of size  $3 \times 3 \times 64$  and stride 1. The output is high-resolution (HR) image of size  $120 \times 240 \times 1$ .~~ TransConv (Transposed Convolutional Layer): This layer is crucial for the task of upscaling. It increases the spatial dimensions of the feature maps, performing a sort of learned interpolation. This reassures us about the model's ability to add details to the upscaled images based on the features extracted and processed  
280 in the earlier layers.
  - ~~The fifth layer is an optional renormalization layer that applies a linear transformation to the HR image to ensure that the total mass or energy is conserved between the LR and HR images.~~ ResBlock (Residual Block): They allow the model to learn corrections (or residuals) to the primary interpolated outputs, refining the details and adding high-frequency

285 information that enhances the perceptual quality of the upscaled images. Adding original input features (from earlier layers) to the output of several convolutional layers ensures that no critical information is lost during processing.

~~For this work, we find the unconstrained CNN(NoCL) performing the best, most likely due to the significant mismatch between low-resolution and~~

### 2.1.3 Constraint layers

290 We test the CNN with three different constraining methods in the last CNN layer: 1- soft constraining (SCL), 2- hard constraining (HCL) and 3- without constraining (NoCL). For a detailed information on the settings used we refer to the work of Harder et al. (2023). In the following, we explain briefly the three different constraining methodologies. The set-up of constraining is as following: consider a factor N for downscaling in all linear directions and let  $n := N^2$  and  $y_i, i = 1, \dots, n$  be the high-resolution samples. A description of the constraint layers can be found in the appendix, see 2.1.3 patch values that correspond to low-resolution pixel  $x$ . The mass conservation law has the following form:

295 
$$\frac{1}{n} \sum_{i=1}^n y_i = x. \tag{1}$$

**Hard constraining:** it uses the SoftMax constraining, which is a constraining for quantities like water content. It enforces the output to be non-negative. For constraining the predicted quantities, we use a SoftMax operator on the intermediate outputs of the neural networks before the constraining layer ( $\tilde{y}_i$ ) and multiply it with the corresponding input pixel value  $x$ :

$$y_i = \exp(\tilde{y}_j) \cdot \frac{x}{\frac{1}{n} \sum_{i=1}^n \exp(\tilde{y}_i)}. \tag{2}$$

300  $y_i$  is the final output after applying the constraints. We have used the mean absolute error (MAE) as the loss function.

**Soft constraining:** This is done by adding a regularization term to the loss function. The MAE loss then extended with an additional constraint violation (CV) loss term to:

$$\text{Loss} = (1 - \alpha) \cdot \text{MAE} + \alpha \cdot \text{CV}, \tag{3}$$

305 where CV is the constraint violation, which is the mean-squared error over all constraint violations between an input pixel  $x$  and the super-pixel (high-resolution grid-cell)  $y_i$ :

$$\text{CV} = \text{MSE}\left(\frac{1}{n} \sum_{i=1}^n y_i, x\right) \tag{4}$$

We use the  $\alpha = 0.99$  in this study.

**Without constraining:** In this setup we remove the constraining layer after the last convolutional layer in the CNN.

310 The constraint layers are applied at the end of the CNN architecture, and all satisfy the criteria that the resulting high-resolution patch conserves the values in low-resolution pixels. The performance of the different settings is assessed through the MAE.

We use the MAE-mean absolute error (MAE) as the loss function. We use 160 epochs, with a batch size of 64 and a learning rate of 0.001 for training with HCL and NoCL; and 0.00001 for SCL. Training takes 15 hours on an NVIDIA Corporation Graphics Ampere 104 [GeForce Ray Tracing Texel eXtreme (RTX) 3060 Ti Lite Hash Rate] graphics processing unit (GPU).  
315 We use the same model set-up as in Harder et al. (2023), and the computational cost of the CNN is very high, therefore, we did not conduct any cross-validation in this study.

We must note that the MAE can be used as both a loss function and an evaluation metric. A loss function is used during training to optimize the neural network parameters, while an evaluation metric is calculated on the validation or test data set to evaluate the model on an independent dataset. Those are two different use cases, but both can use an MAE.

## 2.2 Evaluation ~~Data~~and testing

320 According to Ciarlo et al. (2021), the choice of observational data significantly influences the added value calculation of an RCM, as well as the extreme events detection. To reduce these issues, they recommended to use observations with a resolution comparable to the one of the model. Therefore, for assessing the added value of ~~COSMO-CLM~~ CCLM with respect to the driving ~~model~~ GCM, we use the Climate Hazards Group InfraRed Precipitation with Station data (CHIRPS) as our gridded observation. CHIRPS has a resolution of  $0.05^\circ$  and covers the area between  $50^\circ\text{S}$ - $50^\circ\text{N}$ . CHIRPS is based on satellite informa-  
325 tion and station data, and, in contrast to reanalysis data, it is independent of climate model simulations. Therefore, CHIRPS could be an excellent alternative to similar but not identical coarse datasets like Global Precipitation Climatology Centre (GPCC) (Becker et al., 2013) for data-sparse regions with convective rainfall (Funk et al., 2015). ~~The APHRODITE's (Asian Precipitation-Highly-Resolved-Observational-Data-Integration-Towards-Evaluation) dataset might be another alternative of an evaluation dataset. However, the merged domain version which could be used for our study, covering the period 1950-2007, is~~  
330 ~~available only at  $0.25^\circ$  and  $0.5^\circ$  horizontal resolutions (Yatagai et al., 2007).~~

For ~~evaluating~~ testing the CNN methods, instead of ~~using~~ CHIRPS, we use the corresponding CCLM simulation (20% of the data, as mentioned above) as our target~~and~~. We calculate the metrics on ~~CNN and the CNN and interpolated~~ GCM outputs with respect to CCLM output.

## 2.3 Metrics

335 ~~In a first step, the~~ The selected GCM, RCM and observational data ~~is~~ are interpolated onto the RCM grid using the distance-weighted average method. Interpolation of the coarser grid to a higher resolution ~~one~~ might create unrealistic values. This issue was discussed in the work of Ciarlo et al. (2021). Usually, the interpolation does not account for the physical processes and constraints that govern the original data, the statistical properties (like mean, variance and skewness) are not preserved, and it introduces ~~artifacts~~ artefacts and errors that depend on the choice of interpolation method, the spatial distribution of the data

340 points and the resolution ratio. Therefore, dynamical/statistical downscaling is used to increase the resolution of the climate data, and we use simple interpolation as a baseline in our study.

Since precipitation does not follow a normal distribution, following Hodson (2022), we use the ~~mean absolute error (MAE)~~ MAE to explore the bias of the ~~simulations emulated and dynamically downscaled precipitation~~ (F) against observations(O):

$$\text{MAE} = \frac{1}{N} \frac{1}{T} \sum_{t=1}^T |F_t - O_t| \quad (5)$$

345 where  ~~$N \cdot T$~~  is equal to the number of time steps(~~T~~). We quantify the added value (AV) as the ability of the downscaling approach to decrease the MAE of the driving GCM when calculated against the reference dataset (CHIRPS or target CCLM simulation), i.e., ~~;~~:

$$\text{AV} = \text{MAE}_{GCM} - \text{MAE}_{CCLM} \quad (6)$$

where  $\text{MAE}_{GCM}$  and  $\text{MAE}_{CCLM}$  are the ~~biases of differences of interpolated~~ GCM and RCM with respect to the reference  
350 dataset.

As an additional metric we also use the climatological bias, i.e., the difference between the model and observations:

$$\text{BIAS} = \text{PR}_{MODEL} - \text{PR}_{OBS} \quad (7)$$

### 3 Results

Figure 3.a shows the topography of the CORDEX-CA simulation domain. Figure 1.b presents the ~~annual climatology mean~~  
355 daily precipitation averaged over all years (mm/day) ~~of daily precipitation~~ as derived from CHIRPS data for the period 1985-2014. The regions with the highest values of precipitation are the mountainous areas of CA. Additionally, also the Asian summer monsoon region north of India and along the Himalayas in the southeastern part of the domain present pronounced precipitation values. Figure 3.c shows the distribution of the WorldClim weather stations (Fick and Hijmans, 2017) over CA, representing a proxy for the density of the station data used in the CHIRPS dataset. Over East China, especially over the Tibetan  
360 Plateau, the observation data distribution ~~could be sparser is sparse~~. The data-model comparison is ~~to be~~ considered unreliable over this region (Randall et al., 2007; Cui et al., 2021; Yan et al., 2020; Russo et al., 2019).

#### 3.1 Added value of CCLM driven by ERAInterim

To characterize the overall performance of the CCLM model in time and space, ~~we~~ Figures 4 and 5 show the maps of ~~yearly annual~~, winter (DJF), and summer (JJA) MAE and mean biases of precipitation between interpolated ERAInterim

365 and CCLM driven by ERAInterim, calculated over the period 1985-2014 with respect to CHIRPS. ~~We calculate the MAE of daily precipitation for 1985-2014 from ERAInterim and CCLM driven by ERAInterim (Eq. 5 and Eq. 6).~~ Figures 4.a-c show the MAE of ERAInterim with respect to CHIRPS for annual, winter and summer averages. The ~~differences in MAEs between ERAInterim and CCLM ( $MAE_{ERAInterim,CHIRPS} - MAE_{CCLM,CHIRPS}$ ) or the added values~~ added value of the CCLM RCM compared to the interpolated ERAInterim GCM are shown in Figures 4.d-f. CCLM ~~bias is higher~~'s MAE is high during the Asian summer monsoon, over the South and Southeast of the domain (regions in magenta). During winter, the bias MAE is generally lower. CCLM presents a ~~bias reduction for prominent locations within the domain~~ MAE reduction for mountainous areas of Afghanistan, Kyrgyzstan and Tajikistan and an increase of bias MAE near the boundaries: South of the domain throughout the year, South and Southeast during the summer.

Added values of GERICS-REMO2015 and RMIB-UGent-ALARO-0 driven by ERAInterim are shown in Figure 4.g-l respectively. The CHIRPS dataset is again used as the observational dataset ~~to calculate MAE and AV according to equations 5 and 6.~~ ~~The AV.~~ The added value of RCM is the most pronounced over areas with complex topography and especially during summer, for all three ~~considered RCMS~~ RCMS considered (Figs.4.d-l). Areas where the ~~downscaling reduces the bias of RCM~~ has smaller MAE than the reanalysis with respect to observations are located over Tajikistan, Kyrgyzstan, North of Afghanistan and part of the Himalayas. Mountain areas of Tajikistan and Kyrgyzstan are the main source of water for the former Soviet Union countries. However, precipitation during the colder seasons might be of more importance for water availability. The annual AV patterns still show positive values over those areas (Figure 4.d,g and j). Considering the whole domain, all three RCMs sensibly reduce the large and local-scale bias of ERAInterim against CHIRPS (**Figure 4**), especially for complex topographies. The nested RCMs show similar values of MAE near their lateral boundaries, with respect to their driving model (Figure 4, ~~panels a,b,c~~). Therefore, negative AV quantities might originate from the boundary effect, especially near the east and south-eastern boundaries, where the monsoonal precipitation is dominant. GERICS-REMO2015 shows pronounced negative added values for annual and winter above Tibet.

### 3.1.1 ~~Added value of CCLM driven by MPI-ESM1-2-HR~~

~~We showed that COSMO-CLM can reduce the bias of its driving reanalysis for daily precipitation, especially over areas with a complex topography like Tajikistan and Kyrgyzstan. In particular, our model simulation shows similar skills as in the previously published CORDEX-CA simulations. Here, we calculate the added value of the CCLM simulations driven by MPI-ESM1-2-HR for 1985-2014. It can be seen in figure ??a that the MPI-ESM1-2-HR shows less bias than the ERAInterim over Tajikistan and Kyrgyzstan. According to Déqué et al. (2007), As an additional check, we also show the bias in the GCM bias is one of the most important sources of uncertainty in the RCM's regional climate projection, and the smaller  $MAE_{MPI-ESM1-2-HR}$  compared to  $MAE_{ERAInterim}$  over Tajikistan and Kyrgyzstan might increase the skill of the final regional projections (under the assumption that the model bias remains conserved under other radiative forcings). The added value of CCLM driven by MPI-ESM1-2-HR shows smaller values over those areas compared to the simulation driven by ERAInterim, especially for summer season (Figure ??f). Our analysis of the two driving datasets (ERAInterim and MPI-ESM1-2-HR) tends to confirm the findings of the Sørland et al. (2018), at least for daily precipitation, that the biases of the GCM-RCM chain are not additive~~

and not independent. For example, in all regions with high values of yearly precipitation, where GCM has a slight bias, the RCM does not present higher biases or vice versa. The large-scale patterns in the parent GCM are usually a limiting factor for the dynamical downscaling following the "garbage in, garbage out" problem (Rummukainen, 2010). AV in an RCM is achieved by the improved representation of surface processes, which usually are present over areas with complex topography (Forma et al., 2015) or over coastal areas with strong land-sea differences (Feser et al., 2011). climatologies of models in figures 5. Once again the biases are pronounced on the right bottom corner of the domain during the JJA and south Tibetan Plateau throughout the year.

### 3.1.1 Extreme precipitation patterns in CCLM and CMIP6 GCMs

~~We explore climate change signals in the high-resolution output, given~~ Given that the CCLM simulation has shown some added value for precipitation over mountainous areas of CA, we explore climate change signals in its high-resolution output. The resulting high-resolution maps might have biases inherited from the GCM-RCM selection. We assume that many model biases remain conserved among the different time slices and, therefore, ~~could~~ can be removed when calculating the changes between the historical (1985-2014) and future periods (2070-2099).

We present the resulting climate change trends in CCLM and the CMIP6 GCMs ensemble statistics (ensemble mean and standard deviation). We analyzed 31, 33 and 38 models for SSP126, SSP370 and SSP585 scenarios with a total number of simulations of 158, 185 and 242, respectively (see Supplementary materials for the list of models used in this study). To give the same weight to individual models, we first calculate the statistics over all the members of each model and then build the final statistics. We have chosen the yearly 99<sup>th</sup> percentile of daily precipitation (PR99 hereafter), which considers the three days of the year with the highest precipitation. We also chose the number of very heavy precipitation days in the period (ECA\_RX20mm) as a different index, one of several precipitation-related indices used to monitor and analyze climate variability and change. For example, this index is often used in climate research to assess the impacts of very heavy precipitation events on water resources, agriculture, and natural ecosystems (Klok and Klein Tank, 2008). Figure 6 presents the changes in averaged PR99 at the end of the century (2070-2099) with respect to the historical period (1985-2014) for CCLM (a,d and g) and CMIP6 GCMs (b,e and h) under different scenarios. The downscaling signals indicate that those characteristics depend on the scenario and time period. The large-scale patterns remain the same among all three selected scenarios with intensification when the anthropogenic influence increases. The standard deviation of the models' ensemble is shown in Figures 6.c,f and i. According to our analysis, the Himalayas, especially Nepal, North India, and Bhutan, have the highest uncertainty among the GCMs and in all scenarios. Except for this area and the eastern boundary of the domain, the standard deviation remains under 3 mm/day. Under the pessimistic SSP585 and the regional rivalry SSP370 scenarios, areas with more than 9 mm/day increase in PR99 for CCLM over Northwest India, North Pakistan, North Iran, Southwest of Iran exist and South and Southeast of Black Sea. A reduction pattern is detected East of the Mediterranean Sea in Jordan, Syria, and South of Turkey. Similar patterns are also observed in the CMIP6 ensemble mean. However, due to the averaging, the GCMs' ensemble mean patterns are around  $\pm 5$  mm/day over those areas. Under the SSP126 scenario, which agrees with the 2°C target, the increasing patterns of more than  $\pm 9$  mm/day for CCLM and  $\pm 5$  mm/day for GCMs disappeared. In CA, areas of increased PR99 over Kyrgyzstan, Tajikistan,

North of Pakistan and Southwest Iran are regions with a considerable risk of rainfall-triggered events like landslides (Wang et al., 2021; Kirschbaum et al., 2010) and floods (for example, Pakistan floods of 2010 and 2022).

435 Figures 7.1,d and g show the ECA\_RX20mm values for CCLM for the three scenarios at the end of the century. The patterns are like those shown in Figure 6, indicating that the number (frequency) of very heavy precipitation days also increases with an enhanced anthropogenic influence, particularly over the Tibetan Plateau. From Figures 7.b,e and h, we conclude that the CMIP6 GCM ensemble also presents a very similar behavior to CCLM. The ensemble standard deviations, however, increase over Tajikistan and Kyrgyzstan for ECA\_RX20mm values (Figures 7.c,f and i). The increased frequency and intensity of  
440 extreme precipitation over elevated areas of CA due to anthropogenic forcing is alerting (Fallah et al., 2023). The presented CCLM simulation contributes to study the sensitivity of dynamical downscaling to different levels of anthropogenic forcing at the local scale. This information might be of interest for the scientific community working on the impact of climate change in CA.

#### 4 CCLM emulator using a ~~Convolutional Neural Network~~CNN

445 We have shown that the dynamical downscaling added value to explore the local effects of climate change during the historical period, especially over areas with enhanced topographical forcings. Here, we create an emulator of ~~COSMO-CLM~~CCLM for precipitation over CA. ~~We demonstrate that the unconstrained CNN model could reconstruct high-resolution features from a coarse GCM, which are like the target COSMO-CLM simulations.~~ As explained previously, a CNN could be trained on our GCM-RCM chain and be applied as a fast and computationally cheap downscaling method. However, the skill of such a model  
450 must be explored and verified.

~~One major source of error in training a CNN is usually the problem of over-fitting. However, in our case, we have an overly complex climate system (i.e. COSMO-CLM) with highly complex precipitation fields as input, and a low-complex CNN on the model side. Therefore, our problem is of an under-fitting nature.~~ Here we want to demonstrate that the emulator ~~has significantly more skill~~is better at downscaling than a simple interpolation, especially for areas receiving extreme precipitation values. More  
455 specifically, our goal is to show that the ~~COSMO-CLM~~CCLM emulator can produce ~~COSMO-CLM-like~~CCLM-like patterns when fed by the parent GCM.

For the CNN approach, we focus on the CA domain ~~introduced as a domain covering~~covering only the former Soviet Union countries (Kazakhstan, Kyrgyzstan, Tajikistan, Turkmenistan, and Uzbekistan) and not the CORDEX-CA domain previously shown in Figure 3. This domain is the region of interest in the Green Central Asia project ~~?~~https://www.greencentralasia.org/en,  
460 which is financed by the German Foreign office. Figure 8.a shows the MAE ~~from of~~from the interpolated MPI-ESM1-2-HR ~~with respect to the COSMO-CLM using the CCLM driven by it~~from the test dataset , i.e., MAE(MPI-ESM1-2-HR, MPI-ESM1-2-HR-CCLM) as the "true" precipitation. As can be seen, ~~COSMO-CLM~~CCLM produces different precipitation values ~~compared to its driving GCM,~~compared to its driving GCM, especially over regions with complex topography. ~~This has been noticed in the added value and downscaling signal maps of COSMO-CLM. To explore a potential skill in~~Here, we assume that the CCLM is the ground truth and check if the  
465 CNN can produce it using the GCM as input data. To evaluate the performance of the emulator, we show the maps of ~~MAE~~

reduction, i.e.,  $MAE_{GCM,CCLM} - MAE_{CNN,CCLM}$  in figures added value in Figures 8.b-d. Comparison of MAE reduction maps shows that the unconstrained CNN produces significant skills over elevated regions of CA and the constrained runs do not present considerable patterns of changes. For example, there are areas of negative and positive added values remarkably close together over elevated areas of CA created by HCL and SCL emulators. NoCL, in contrast, shows systematic positive values over large parts of the domain. The fingerprint of the GCM is detectable. There are several artifacts in the MAE reduction maps of constrained models, especially over North of India, which represent the GCM grid shape. We produce the boxplots of daily precipitation over the newly-considered domain CA domain covering the former soviet union to explore the improvement in the distributions (Figure 9). The correlation coefficients between the time-series of average precipitation over the domain with respect to CCLM are also presented in Figure 9 (values in the parentheses). For the daily averages, NoCL presents the best performance (highest correlation coefficient). However, the values of outliers are less smaller than the ones from CCLM and all other model simulations. The distribution is more condensed around the median (smallest interquartile range). The distribution of all constrained models both constrained models (HCL, SCL) is like the interpolated GCM one. This was expected, since the constraining conserves the mass of high-resolution grid-boxes within the corresponding low-resolution grid-box (Equation 1).

#### 4.1 Applying the CNN to a different GCM

Here, we evaluate the emulator's generalization ability, i.e. the ability to create reliable predictions on a new data set. We conduct here a new 15-year dynamical simulation with COSMO-CLM-CCLM driven by the EC-Earth3-Veg (Döscher et al., 2022) GCM under ssp370 from 2019 to 2033. We use this data as input to our COSMO-CLM-CCLM emulator, which was previously trained on the MPI-ESM1-2-HR and its COSMO-CLM run to emulate CCLM using MPI-ESM1-2 HR as input GCM. We now use the emulator to reconstruct the local features of COSMO-CLM-CCLM driven by EC-Earth3-Veg. Figure 10.a presents the MAE of the interpolated EC-Earth3-Veg with respect to the dynamically downscaled simulation using COSMO-CLM dynamical downscaling with CCLM, i.e., the COSMO-CLM-CCLM simulation driven by EC-Earth3-Veg. The MAE pattern of EC-Earth3-Veg is remarkably like the one from MPI-ESM1-2-HR (Figure 8.a). However, the COSMO-CLM-CCLM emulator based on the NoCL CNN model does not show positive error reduction everywhere in the domain (Figure 10.b). We chose the NoCL CNN because it showed the best performance among the constrained ones. Training the CNN on the MPI-ESM1-2-HR/CCLM might have ignored learning processes which overcome considerable biases in the driving GCM. The COSMO-CLM-CCLM emulator tries to find relations between the MPI-ESM1-2-HR and COSMO-CLM-CCLM, which might be specific to these two models and there is no guarantee that those relationships also apply to the new EC-Earth3-Veg and COSMO-CLM-CCLM driven by EC-Earth3-Veg. This new GCM-RCM chain contains new sets of models and is extremely sensitive to the characteristics of the EC-Earth3-Veg model because, as we showed previously, the RCM state follows the state of its driving GCM. We note that CCLM is driven at the lateral boundaries by the GCM values for the state variables of CCLM (temperature, pressure, wind speed etc.). Precipitation is not used for driving the RCM. The CNN input is the GCM precipitation, which has different biases in the two GCM, and therefore the mapping from the MPI-ESM1-2-HR-precipitation to the CCLM precipitation cannot be successfully transferred to EC-Earth3-Veg.



Knowing these limitations, the CNN model shows added values of more than 1 mm/day over the Alborz Mountains and South of the Caspian Sea in the North of Iran (black rectangular in Figures 10.a and b) and some parts of Tajikistan and Kyrgyzstan. Exploring the field mean of daily precipitation distribution indicates that the CNN's median value and the outliers are lower than both the EC-Earth3-Veg and COSMO-CLM-CCLM simulations (Figure 10.c). Only the day-to-day correlation is being improved. ~~The model was~~ As mentioned before, all model were trained on the shuffled dataset and ignored the memory in the time series but here ~~we fed the original (without shuffling) dataset and calculated the correlation~~ the trained NoCL model was given unshuffled EC-EARTH3-Veg to make new predictions. The correlation coefficient increases using the NoCL model from 0.815 (EC-Earth3-Veg) to 0.844 (NoCL). Over the black rectangular box in Figure 10.b, the region where the NonCL model reduces the MAE, i.e., the ~~black rectangular box in Figure 10.b, the~~ distribution of precipitation converges to the one from COSMO-CLM-CCLM (Figure 10.d). ~~Only the outliers larger than 20 mm/day are not reconstructed by the NoCL. This region and~~ receives the highest amount of precipitation in Iran and supplies water for a large portion of population in the country, including the capital city Tehran with a population of over 10 million people. Only the outliers larger than 20 mm/day are not reconstructed by the NoCL.

As a new test for generalization, we intentionally did not include a scenario (SSP370) in the training process. This move allowed us to apply the model to a specific simulation and witness its ability to reproduce an unknown forcing. Figure 11 demonstrates the AV of the CNN emulator for SSP370 in comparison to the dynamical downscaling with CCLM, i.e., the CCLM simulation driven by SSP370. The AV pattern is strikingly similar to the one shown in Figure 8.d. We conclude that the CNN can learn patterns it was not trained for, as evidenced by the SSP370 scenario.

## 5 Discussion and conclusions

Regional climate change impact assessments require high resolution climate projections. The main strategies to produce such datasets are statistical and dynamical downscaling, as well as a hybrid of the two methods. Statistical downscaling (SD) usually has limited capability to consider the dynamic influences of the complex topography. The large-scale domain does not reflect the spatial diversity and variation of the local climate and the topography, which may affect the accuracy of the statistical relationships (Li et al., 2022). For SD applied to precipitation, the observations need to contain detailed information about the precipitation distribution in areas with complex topography (Lundquist et al., 2019). On the other hand, dynamical downscaling requires ~~a massive amount of~~ massive computational time and data storage space. A 30-year CCLM simulation driven by ERAInterim took roughly one week to finish using 216 processors of the HLRE-4 Levante computer at the German Climate Computing Center (DKRZ). Additionally, the added value of RCMs is still debated, ~~since~~ since they are highly dependent on the driving GCMs.

In this study, we contribute to the few dynamical downscaling efforts over the CORDEX-CA domain, a small step towards an RCM ensemble creation for CA. A single RCM simulation can help identify model biases and uncertainties that need to be addressed in future model improvements. It is essential to note that relying solely on a single model run for CMIP6 instead, of an RCM ensemble, may not provide any comprehensive understanding of the potential climate change impacts on a region.

Therefore, it is recommended that researchers conduct multiple simulations with different initial and boundary conditions and different model configurations to account for the uncertainty associated with climate projections.

535 In a first part of the study we demonstrate the added value of RCMs (here we chose to use the COSMO-CLM/CCLM model) over GCMs for CA in the representation of precipitation. Our ~~COSMO-CLM run shows AV~~ CCLM run shows added value with respect to its driving GCM, comparable to the range of values obtained for other RCMs applied to the CORDEX-CA domain over the evaluation period. It also reproduces extreme precipitation changing patterns like the CMIP6 ensemble mean at the end of the century. Both ~~COSMO-CLM-CCLM~~ and CMIP6 ensemble present elevated risk (frequency and intensity) of heavy precipitation events over vulnerable areas of CA due to different anthropogenic influences.

540 Our study evaluated the downscaling skill primarily using higher resolution observations, which are critical for capturing localized climate phenomena relevant to regional adaptation strategies. However, as Volosciuk et al. (2017) noted, examining downscaling outputs at coarser resolutions can be equally informative. Their work emphasizes that downscaling methods can introduce or fail to correct biases that differ significantly across spatial scales. By evaluating on a coarser grid, it is possible to distinguish between the inherent biases of the model and those introduced by the downscaling process. This distinction  
545 is crucial for understanding the limitations and strengths of downscaling methods in representing climatic variables across different scales.

Additionally, acknowledging the computational and memory constraints of ~~an RCM to be run at very~~ running an RCM at high resolution, here we also show that a single GCM-RCM model chain can be used to train a climate emulator based on a CNN model. It can learn some nonlinear and physical relationships between the coarse and fine-resolution datasets, ~~based on~~  
550 ~~atmospheric governing equations~~. This can overcome the problem of spatial intermittency seen in some statistical downscaling approaches (~~Harder et al., 2022~~)(Harder et al., 2023). However, we have also shown that the CNN model has limitations, namely when generalizing, as it did not achieve a robust error-reduction pattern ~~when applied to a different GCM-CCLM chain given a different GCM as input~~. The learning process depends strongly on the GCM/CCLM relationships. More importantly, an RCM is forced to follow its driving GCM and only on local scales can produce extra information. ~~Therefore, we~~  
555 ~~recommend running a GCM-RCM simulation for several years and evaluating the model performance before applying it to a new specific GCM.~~ An application of the presented CCN ~~is~~ could be to apply it for other experiments of the same GCM: One ~~can~~ could use the trained emulator for paleo-climate experiment of the parent GCM to create more than 10,000 years of downscaled simulation. One can also downscale the volcanic forcing experiments using the trained emulator. This will aid the paleo-climate community in conducting proxy-model comparisons at local scales. However, previous studies have shown that  
560 the CNN suffers from the same generalisation problem as when applied to a new GCM and such applications must be tested (Jouvet and Cordonnier, 2023).

In an effort to evaluate the model's generalization capabilities, we deliberately excluded the SSP370 scenario from the training dataset. This strategy was implemented to assess whether the model could effectively infer and replicate patterns from untrained scenarios. Remarkably, the model's output for the SSP370 scenario exhibits an AV pattern that closely mirrors  
565 the dynamical downscaling results obtained with the CCLM, driven by the same SSP370 scenario. This alignment strongly supports the notion that our CNN emulator is not only capable of learning from its training data but also proficient in

generalizing to new, unseen conditions. The similarity in AV patterns between the model output and the CCLM simulation underscores the robustness and adaptability of our model, affirming its potential for broader applicative scenarios in climate modelling.

570 We note that this work is only a step to demonstrate the potential of such a hybrid approach, and we encourage the community to explore different model structures and parameter combinations for further improvement. For example, our few model set-ups showed that ~~the constrained model using a physically constrained CNN set-up, that applies a linear transformation to the high-resolution image to ensure that the total mass or energy is conserved between the low and high-resolution images,~~ did not successfully downscale the precipitation. The constraints might not be satisfied in the original dataset and therefore  
575 the constrained model set-up did not lead to better results. In contrast, with a higher degree of freedom, the unconstrained ~~model run produced more realistic patterns.~~ Alternative CNN produced patterns closer to the target RCM. Alternative machine learning models, such as generative adversarial networks (~~GANGANS~~), which can generate more high-frequency patterns, might improve the downscaled pattern, and ~~should could~~ be tested in future studies. An additional set-up might be to ~~add~~ provide more information to the CNN by adding characteristics like surface height, vegetation, land-cover, land-use, etc. as  
580 new channels within the input layer.

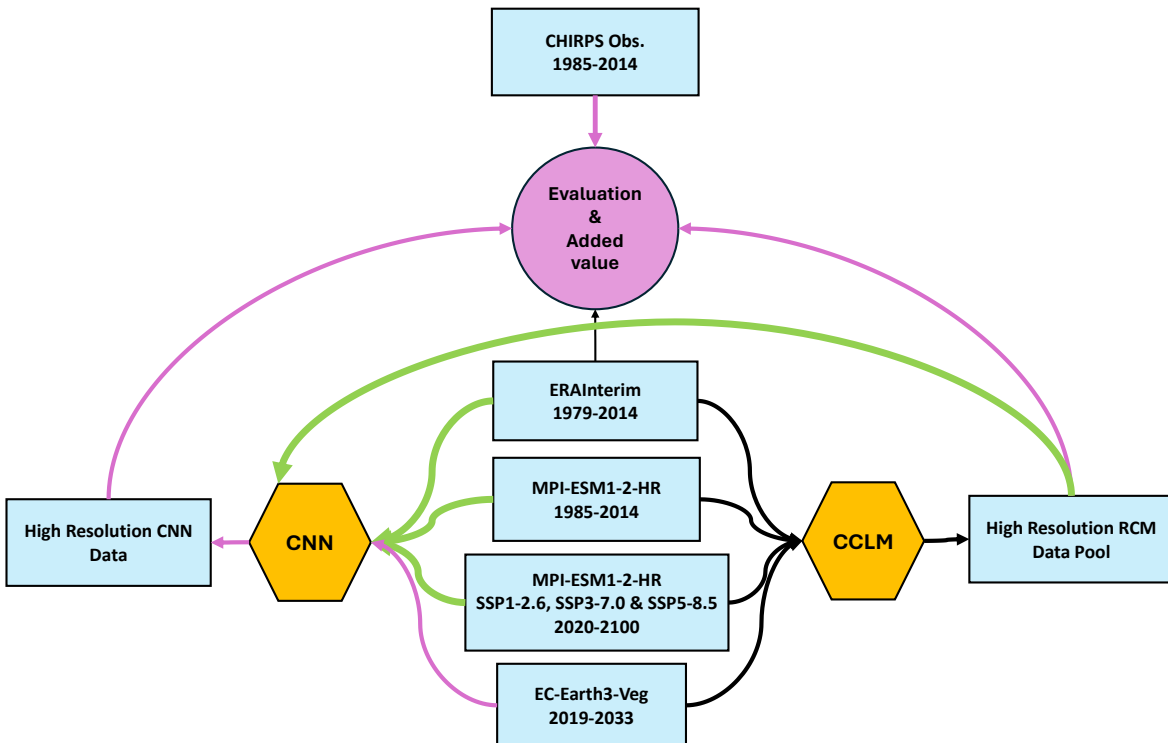

Figure 1. Schematic of the methodology used in this study. Green arrows show the data flow used for training the CNN and magenta for evaluation and calculation of the added values. Datasets are shown by rectangular, downscaling models by hexagonal and evaluation analysis by circle.

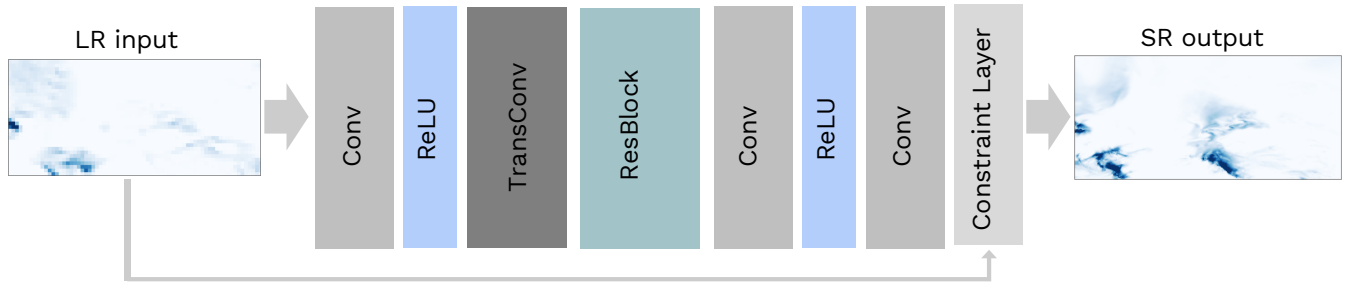

**Figure 2.** Schematic of the CNN architecture for 2 times upsampling with the constraints layer. The inputs are low-resolution (LR) images of size  $30 \times 60$  and the output is a super-resolution (SR) image of size  $60 \times 120$ . This figure is modified from (Harder et al., 2023).

*Code availability.* The code for "Physics-Constrained Deep Learning for Climate Downscaling," is available on Zenodo at the following DOI: <https://zenodo.org/uploads/8150694>. The input, output, trained models, a snapshot of the code employed in the deep-learning downscaling process, COSMO-CLM model setups for all Regional Climate Model (RCM) simulations conducted, a list of CMIP6 model information used for comparative analysis, and a Jupyter notebook for executing a test case of the "Physics-Constrained Deep Learning for Climate Downscaling" as described in the manuscript are available at Zenodo with the following DOI: <https://zenodo.org/records/10417111>.

## Appendix A: Constraint layers

We test the CNN with three different constraining methods in the last CNN layer: 1–soft constraining (SCL), 2–hard constraining (HCL) and 3–without constraining (NoCL). For a detailed information on the settings used we refer to the work of Harder et al. (2022). In the following we explain briefly the three different constraining methodologies. The set-up of constraining is as following:

590 Consider a factor  $N$  for downscaling in all linear directions and let  $n := N^2$  and  $y_i, i = 1, \dots, n$  be the high-resolution patch values that correspond to low-resolution pixel  $x$ . The mass conservation law has the form of the following constraint:-

$$\frac{1}{n} \sum_{i=1}^n y_i = x.$$

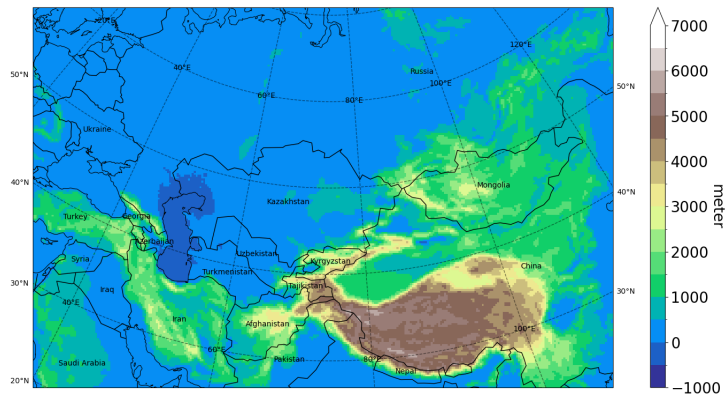

(a)

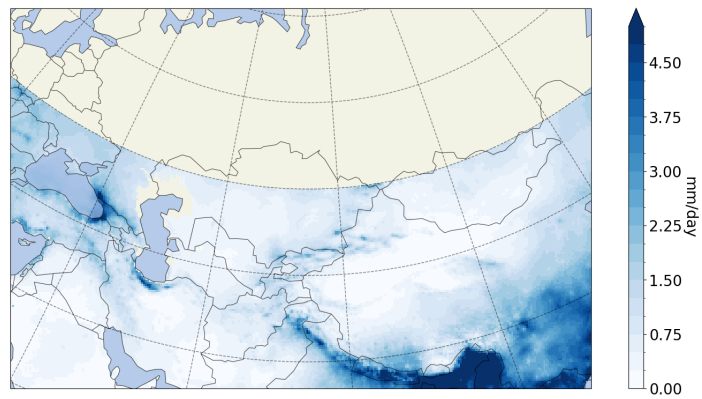

(b)

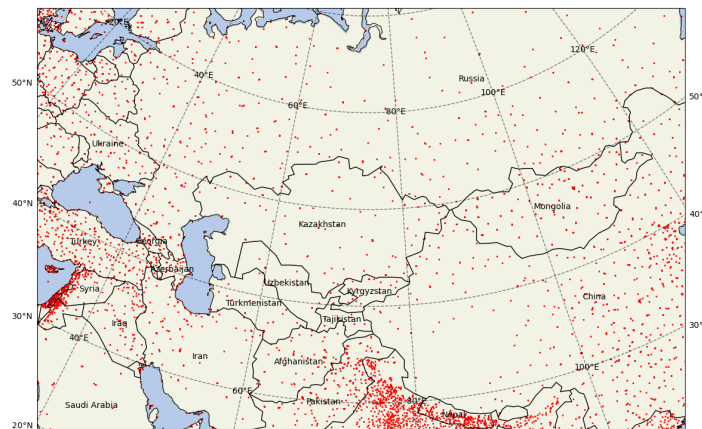

(c)

**Figure 3.** a) Study region-CCLM simulation domain over Central Asia and the topography (m), (b) CHIRPS climatology for 1985-2014 (average of daily values over all years in mm/day), and (c) WorldClim's weather stations (red dots).

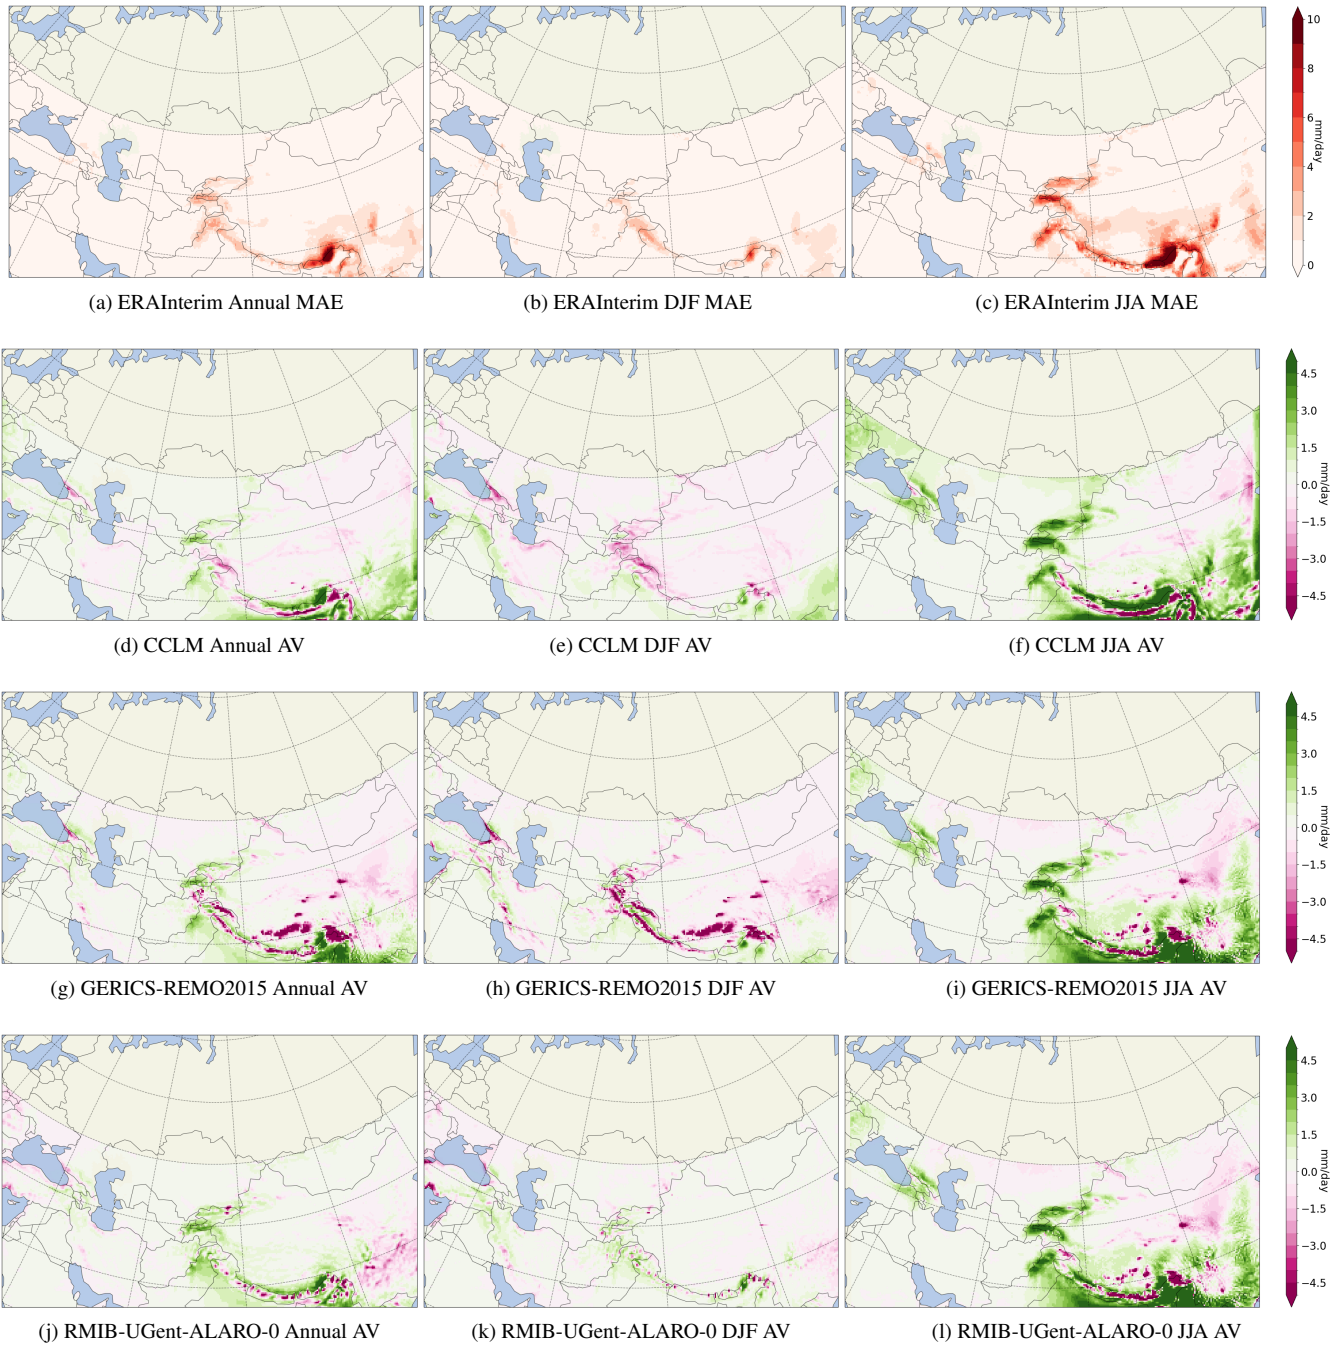

**Figure 4.** Mean average error (MAE) of daily precipitation (mm/day) from ERAInterim, as well as, added value (AV) as measured by MAE differences between ERAInterim and RCMs ( $MAE_{ERAInterim} - MAE_{RCM}$ ) in mm/day for annual (a,d,j,i), winter December, January, February (b,e,h,k) and summer June, July, August (c,f,i,l). CHIRPS is used as observation. All datasets are interpolated to the CCLM grid.

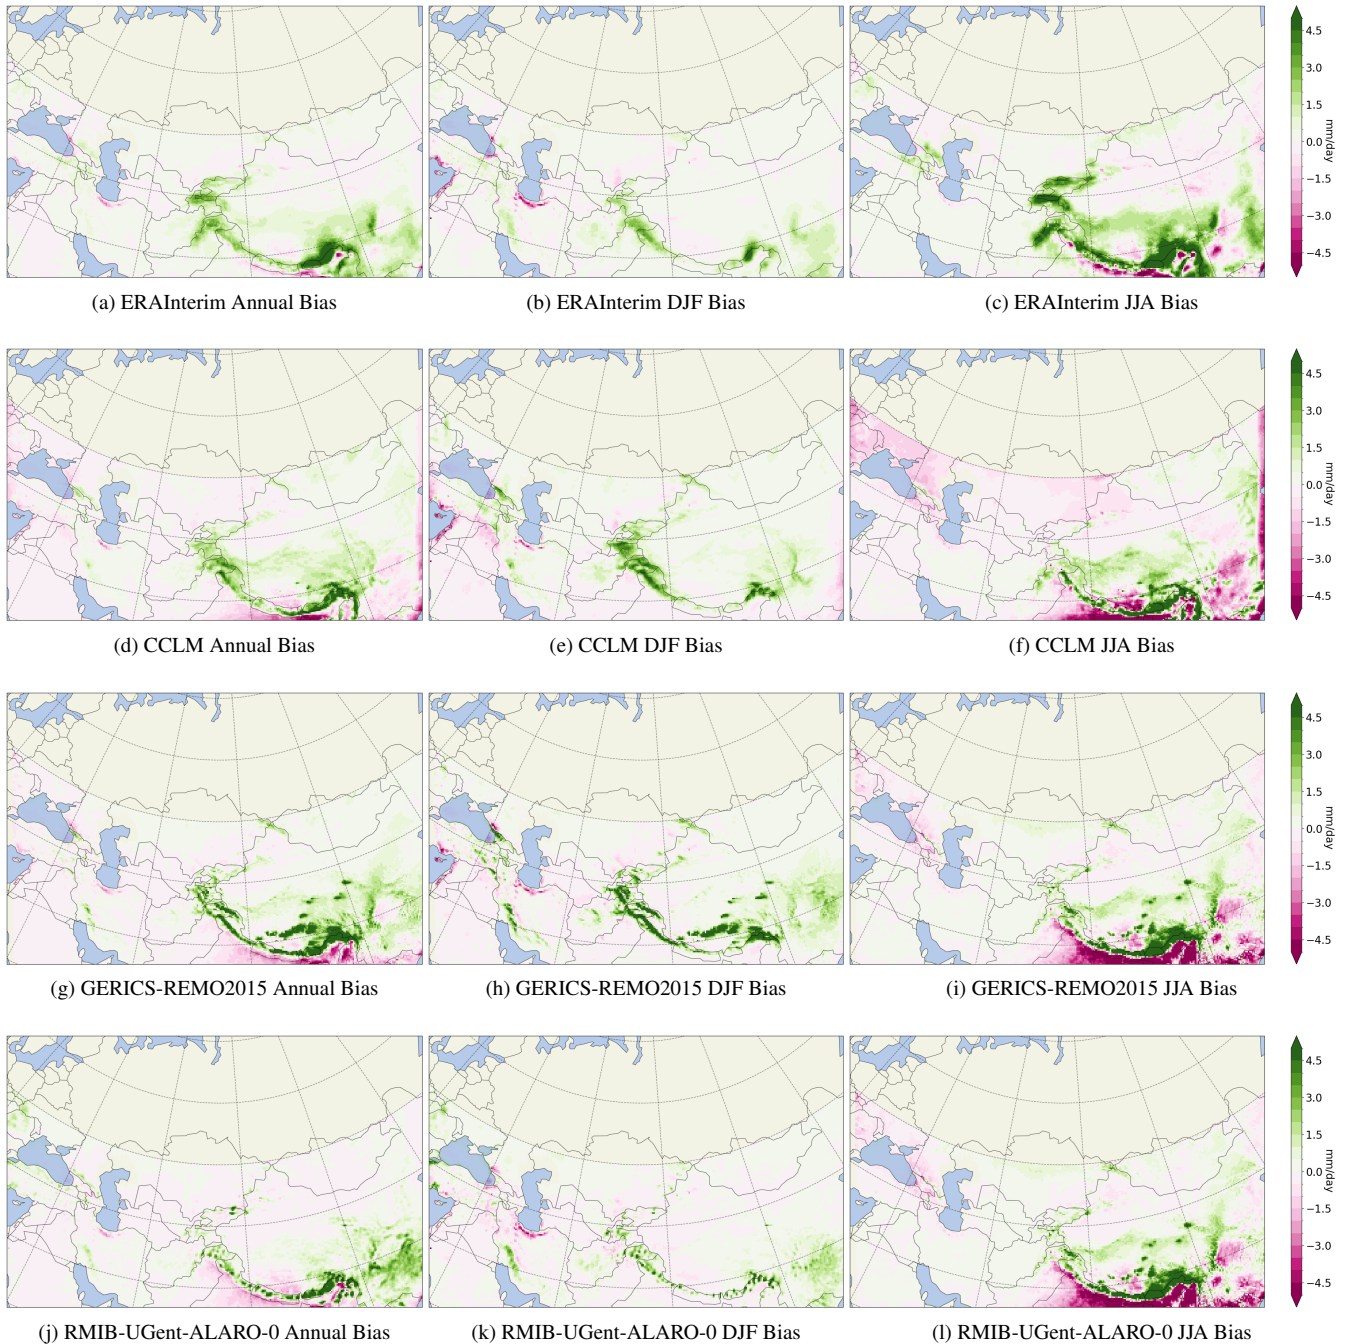

**Figure 5.** MAE-Bias of daily climatological precipitation (mm/day) from MPI-ESM1-2-HR/ERAInterim, as well as, added value (AV) as measured by MAE differences between MPI-ESM1-2-HR and ERAInterim-driven RCMs ( $MAE_{MPI-ESM1-2-HR} - MAE_{RCM}^{PR_{ERAInterim-CCLM-PROBS}}$ ) in mm/day for annual (a and d, j, l), winter-December, January, February (b and e, h, k) and summer-June, July, August (c and f, i, l). CHIRPS is used as observation.

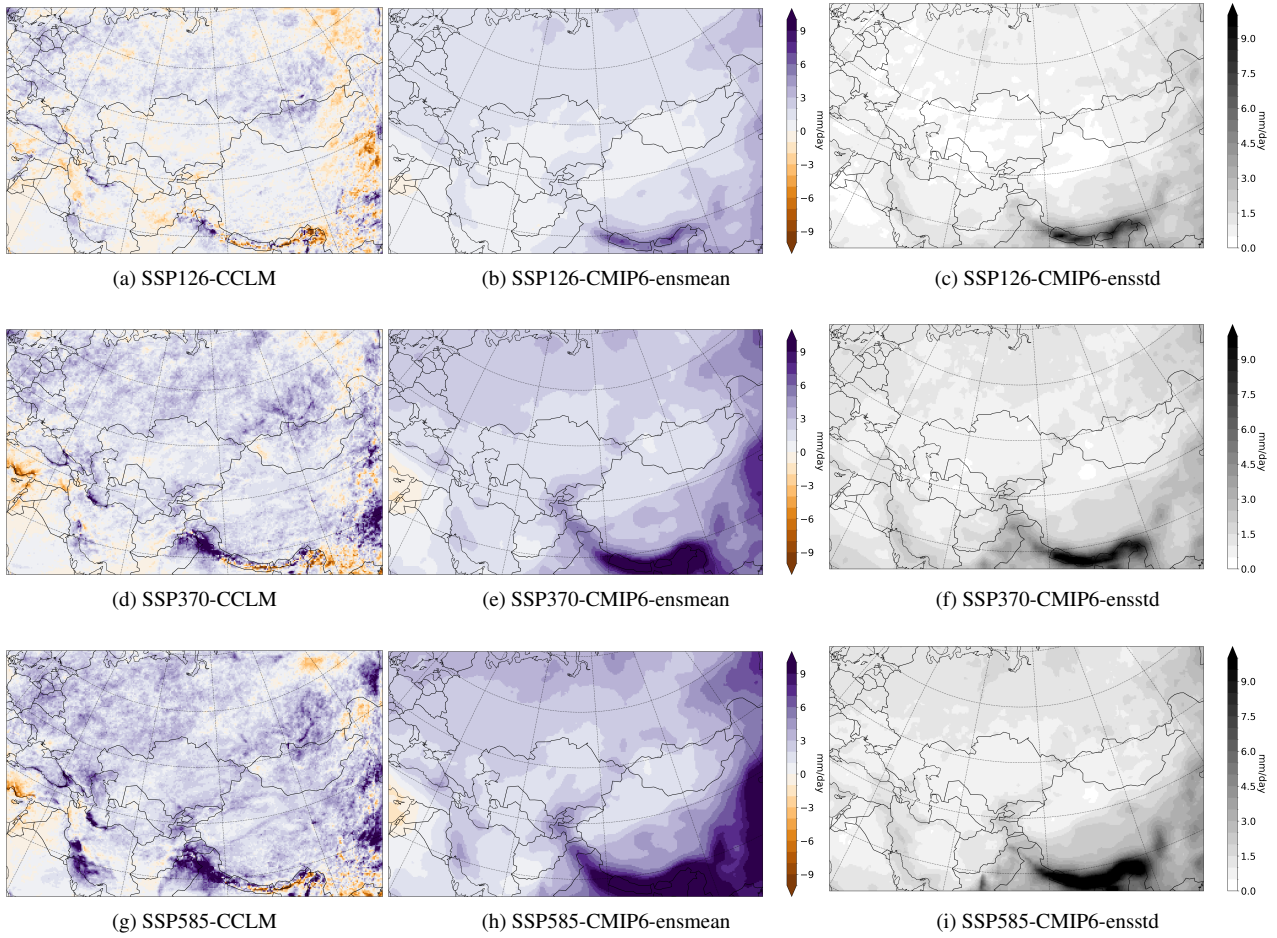

**Figure 6.** Changes in averaged yearly 99<sup>th</sup> percentile (3 days per year) of total precipitation (mm/day) with respect to 1985-2014 references for a,b) SSP126, d,e) SSP370 and g,h) SSP585 at the end of the century (2070-2099) from CCLM and CMIP6 GCMs' ensemble mean. The ensemble's standard deviations are shown in c,f and i.

595 **Hard constraining:** It uses the SoftMax constraining, which is a proper constraining for quantities like water content. It enforces the output to be non-negative. For constraining the predicted quantities, we use a SoftMax operator on the intermediate outputs of the neural networks before the constraining layer ( $\tilde{y}_i$ ) and multiply it with the corresponding input pixel value  $x$ :

$$y_i = \exp(\tilde{y}_j) \cdot \frac{x}{\frac{1}{n} \sum_{i=1}^n \exp(\tilde{y}_i)}$$

$y_i$  is the final output after applying the constraints. We have used the mean absolute error (MAE) as the loss function.



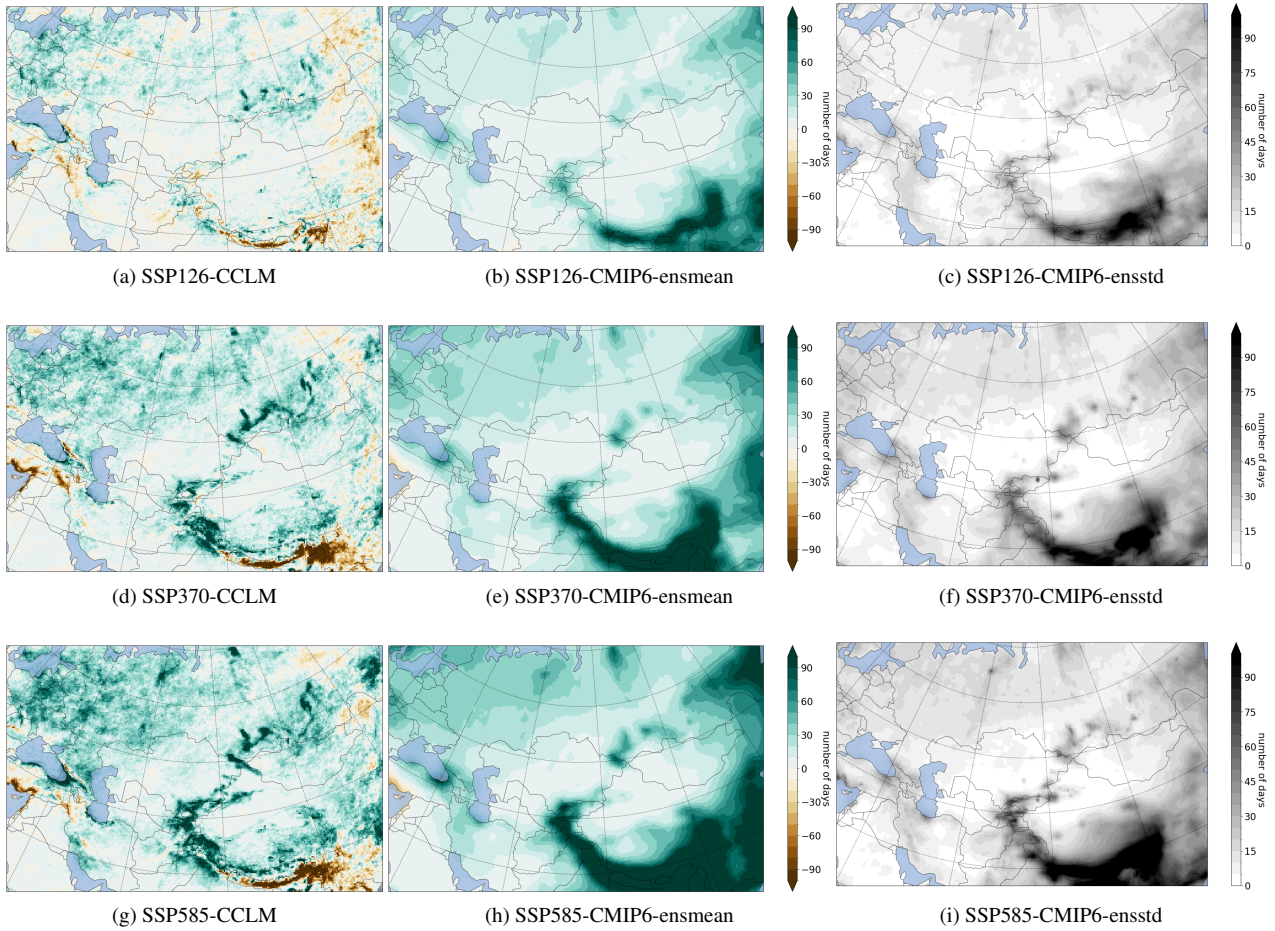

**Figure 7.** Changes in number of days with precipitation more than ~~20mm~~ 20 mm in the period with respect to 1985-2014 references for a,b) SSP126, d,e) SSP370 and g,h) SSP585 at the end of the century (2070-2099) from CCLM and CMIP6 GCMs' ensemble mean. The ensemble's standard deviations are shown in c,f and i.

**Soft constraining:** This is done by adding a regularization term to the loss function. MAE is then changed to the following:-

$$\text{Loss} = (1 - \alpha) \cdot \text{MAE} + \alpha \cdot \text{CV},$$

600 where CV is the constraint violation, which is the mean overall constraint violations between an input pixel  $x$  and the super-pixel (high-resolution grid-cell)  $y_i$ :-

$$\text{CV} = \text{MSE}\left(\frac{1}{n} \sum_{i=1}^n y_i, x\right)$$

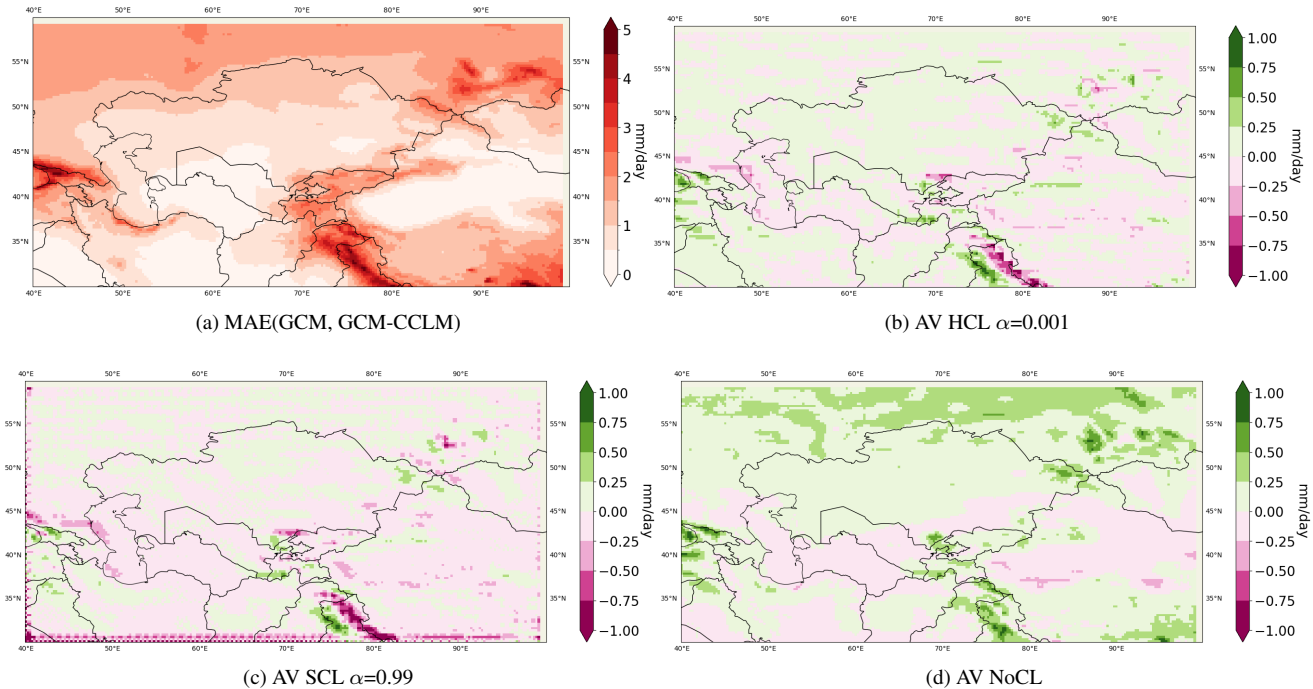

**Figure 8.** a) MAE (MPI-ESM1-2-HR,CCLM). MPI-ESM1-2-HR is remapped bilinearly to the  $0.25 \times 0.25$  grid. b-d) Added Value (AV) or MAE(MPI-ESM1-2-HR,CCLM) - MAE(CNN,CCLM) for different constraining method.

~~We use the  $\alpha = 0.99$  in this study.~~

~~**Without constraining:** In this setup we remove the constraining layer after the last convolutional layer in the CNN. We use the MAE as the loss function.~~

~~The constraint layers are applied at the end of the CNN architecture, and all satisfy the criteria that the resulting high-resolution patch shall conserve the values in low-resolution pixels. The performance of the different settings will be assessed through the MAE.~~

## Appendix A: CNN runs

610 We used the following commands for training the CNN model based on the [Harder et al. \(2022\)](#)[Harder et al. \(2023\)](#):

```
# for the run with soft constraining run, with a factor of alpha 0.99 :
```

```
615 $ python main.py --dataset dataset --model cnn --model_id
twc_cnn_soft_constraints_epochs_160_lr_0.00001_alpha_0.99
--constraints soft --loss mass_constraints --alpha 0.99
--epochs 160 --batch_size 64 --lr 0.00001
```

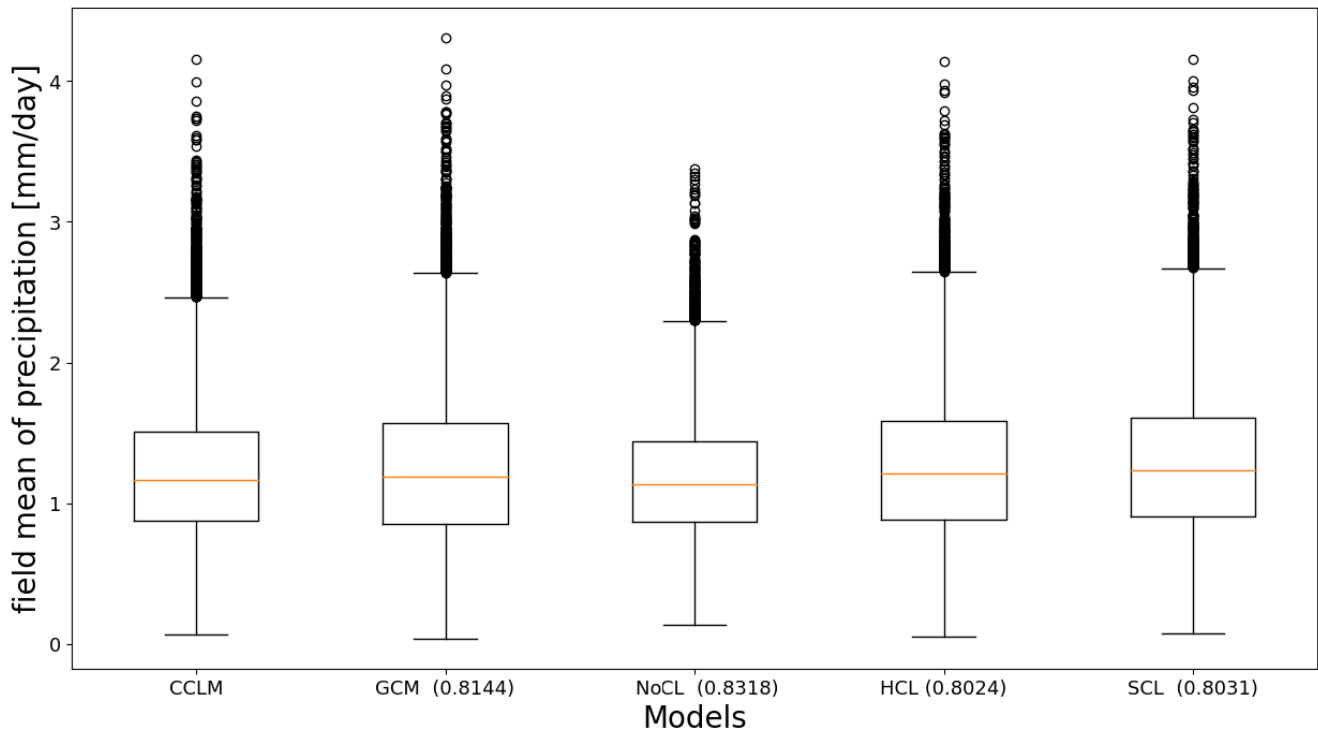

**Figure 9.** Boxplot of averaged daily precipitation over the [Central Asian domain \(shown in Figure 7\)](#) for different models [and test dataset \(22714 days or 62.2 years\)](#). Numbers in the parenthesis indicate the correlation coefficients between each model and the CCLM simulation.

```

# for the run with softmax constraining or hard constraining :
620 $ python main.py --dataset dataset --model cnn --model_id
    twc_cnn_softmaxconstraints_epochs_200_batch_size_64_lr_0.001
    --constraints softmax --lr 0.001 --epochs 160 --batch_size 64 --loss mae

# for the standard CNN run without constraining :
625 $ python main.py --dataset dataset --model cnn --model_id
    twc_cnn_noneconstraints_epochs_160_batch_size_64_lr_0.001
    --constraints none --lr 0.001 --epochs 160 --batch_size 64 --loss mae

```

Note that the datasets ~~available at shall be downloaded in a folder called dataset~~ [and codes are available at Zenodo \(DOI: https://zenodo.org/records/10417111\)](#) [with comprehensive details utilized in the paper.](#)

~~The final model run outputs could be find here :-~~

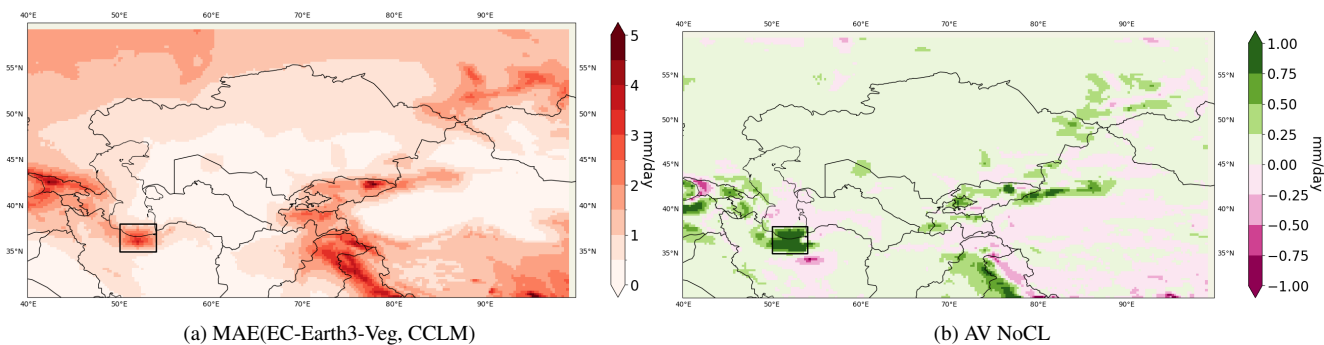

(a) MAE(EC-Earth3-Veg, CCLM)

(b) AV NoCL

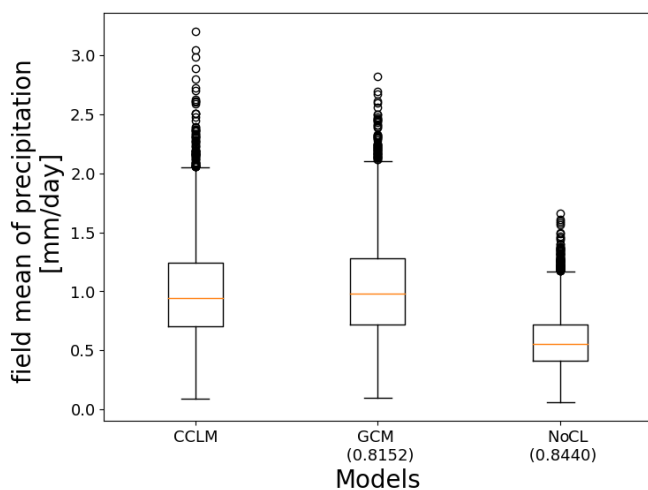

(c) CA

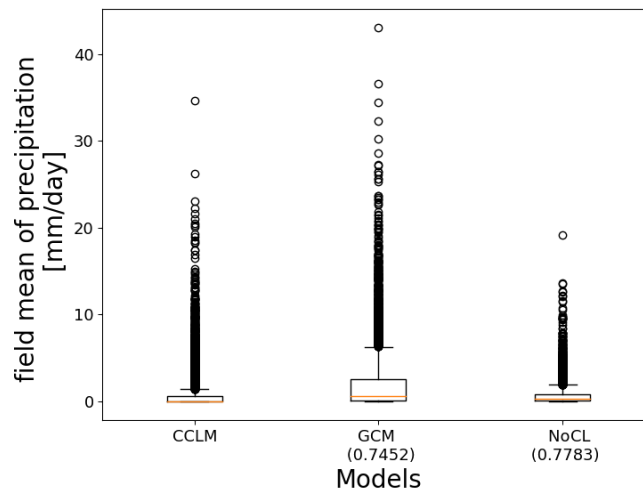

(d) Box

**Figure 10.** a) MAE of GCM (EC-Earth3-Veg) vs CCLM run. GCM is remapped bilinearly to the  $0.25 \times 0.25$  grid. b) Added value (AV) or MAE reduction ( $\text{MAE}(\text{EC-Earth3-Veg}, \text{CCLM}) - \text{MAE}(\text{CNN}, \text{CCLM})$ ) for unconstrained method. c) and d) boxplots of averaged daily precipitation over the CA domain and the black box shown in a and b over North of Iran. Numbers in the parenthesis indicate the correlation coefficients of each model with respect to CCLM.

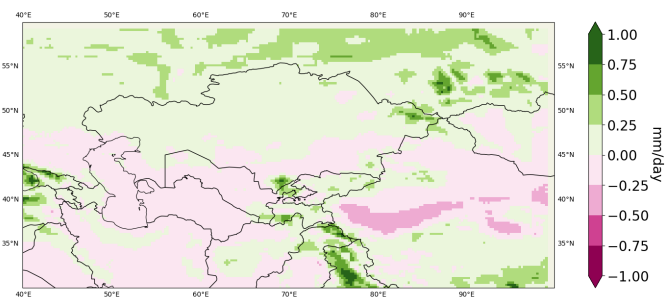

**Figure 11.** Added value (AV) or MAE reduction ( $\text{MAE}(\text{EC-MPI-ESM1-2HR}, \text{CCLM}) - \text{MAE}(\text{CNN}, \text{CCLM})$ ) for an unconstrained method that was not trained but applied to the SSP370 scenario.

*Author contributions.* BF, conducted the dynamical and statistical downscaling with help of ER and PH, respectively. ER provided the CCLM set-up. PH provided the deep learning model code and set-up. All authors contributed to the analysis of the results and writing the manuscript.

635 *Competing interests.* No competing interests.

*Acknowledgements.* BF thanks the German Climate Computing Center (DKRZ) for its support in using supercomputer data and resources. The German Foreign Office funds BF and ID via the Green Central Asia project (<http://greencentralasia.org/en>, last access: 4 July 2023). The DKRZ and PIK provided the computational resources. [The authors gratefully acknowledge the German Federal Ministry of Education and Research and the Land Brandenburg for supporting this project by providing resources on the high performance computer system at the Potsdam Institute for Climate Impact Research.](#) BF thanks the CCLM-community for providing the model code and the pre-processing code to convert the GCM to CCLM input files.

640

## References

- Allan, R. P., Hawkins, E., Bellouin, N., and Collins, B.: IPCC, 2021: summary for Policymakers, IPCC, 2021.
- Ban, N., Schmidli, J., and Schär, C.: Heavy precipitation in a changing climate: Does short-term summer precipitation increase faster?  
645 Geophysical Research Letters, 42, 1165–1172, 2015.
- Baño-Medina, J., Manzanar, R., and Gutiérrez, J. M.: On the suitability of deep convolutional neural networks for continental-wide downscaling of climate change projections, *Climate Dynamics*, 57, 2941–2951, 2021.
- Becker, A., Finger, P., Meyer-Christoffer, A., Rudolf, B., Schamm, K., Schneider, U., and Ziese, M.: A description of the global land-surface precipitation data products of the Global Precipitation Climatology Centre with sample applications including centennial (trend) analysis  
650 from 1901–present, *Earth System Science Data*, 5, 71–99, 2013.
- Böhm, U., Gerstengarbe, F.-W., Hauffe, D., Kücken, M., Österle, H., and Werner, P. C.: Dynamic regional climate modeling and sensitivity experiments for the northeast of Brazil, *Global Change and Regional Impacts: Water Availability and Vulnerability of Ecosystems and Society in the Semiarid Northeast of Brazil*, pp. 153–170, 2003.
- Chokkavarapu, N. and Mandla, V. R.: Comparative study of GCMs, RCMs, downscaling and hydrological models: a review toward future  
655 climate change impact estimation, *SN Applied Sciences*, 1, 1698, 2019.
- Ciarlo, J. M., Coppola, E., Fantini, A., Giorgi, F., Gao, X., Tong, Y., Glazer, R. H., Torres Alavez, J. A., Sines, T., Pichelli, E., et al.: A new spatially distributed added value index for regional climate models: the EURO-CORDEX and the CORDEX-CORE highest resolution ensembles, *Climate Dynamics*, 57, 1403–1424, 2021.
- Cui, T., Li, C., and Tian, F.: Evaluation of temperature and precipitation simulations in CMIP6 models over the Tibetan Plateau, *Earth and  
660 Space Science*, 8, e2020EA001 620, 2021.
- Demory, M.-E., Berthou, S., Fernández, J., Sørland, S. L., Brogli, R., Roberts, M. J., Beyerle, U., Seddon, J., Haarsma, R., Schär, C., et al.: European daily precipitation according to EURO-CORDEX regional climate models (RCMs) and high-resolution global climate models (GCMs) from the High-Resolution Model Intercomparison Project (HighResMIP), *Geoscientific Model Development*, 13, 5485–5506, 2020.
- 665 Déqué, M., Rowell, D., Lüthi, D., Giorgi, F., Christensen, J., Rockel, B., Jacob, D., Kjellström, E., De Castro, M., and van den Hurk, B.: An intercomparison of regional climate simulations for Europe: assessing uncertainties in model projections, *Climatic Change*, 81, 53–70, 2007.
- Di Luca, A., de Elfa, R., and Laprise, R.: Potential for added value in precipitation simulated by high-resolution nested regional climate models and observations, *Climate dynamics*, 38, 1229–1247, 2012.
- 670 Di Luca, A., de Elfa, R., and Laprise, R.: Challenges in the quest for added value of regional climate dynamical downscaling, *Current Climate Change Reports*, 1, 10–21, 2015.
- Didovets, I., Krysanova, V., Nurbatsina, A., Fallah, B., Krylova, V., Saporova, A., Niyazov, J., Kalashnikova, O., and Hattermann, F. F.: Attribution of current trends in streamflow to climate change for 12 Central Asian catchments, *Climatic Change*, 177, 16, 2024.
- Dong, C., Loy, C. C., He, K., and Tang, X.: Image super-resolution using deep convolutional networks, *IEEE transactions on pattern analysis and machine intelligence*, 38, 295–307, 2015.  
675
- Döscher, R., Acosta, M., Alessandri, A., Anthoni, P., Arneth, A., Arsouze, T., et al.: The EC-Earth3 Earth system model for the Coupled Model Intercomparison Project 6. *Geosci. Model Dev.* 15, 2973–3020, 2022.

- Dosio, A. and Panitz, H.-J.: Climate change projections for CORDEX-Africa with COSMO-CLM regional climate model and differences with the driving global climate models, *Climate Dynamics*, 46, 1599–1625, 2016.
- 680 Fallah, B. and Rostami, M.: Exploring the impact of the recent global warming on extreme weather events in Central Asia using the counterfactual climate data ATTRICI v1. 1, *Climatic Change*, preprint, <https://doi.org/10.21203/rs.3.rs-2106031/v1>, 2024.
- Fallah, B., Saberi, A. A., and Sodoudi, S.: Emergence of global scaling behaviour in the coupled Earth-atmosphere interaction, *Scientific Reports*, 6, 34005, 2016a.
- Fallah, B., Sodoudi, S., and Cubasch, U.: Westerly jet stream and past millennium climate change in Arid Central Asia simulated by COSMO-CLM model, *Theoretical and Applied Climatology*, 124, 1079–1088, 2016b.
- 685 Fallah, B., Russo, E., Menz, C., Hoffmann, P., Didovets, I., and Hattermann, F. F.: Anthropogenic influence on extreme temperature and precipitation in Central Asia, *Scientific Reports*, 13, 6854, 2023.
- Feser, F., Rockel, B., von Storch, H., Winterfeldt, J., and Zahn, M.: Regional climate models add value to global model data: a review and selected examples, *Bulletin of the American Meteorological Society*, 92, 1181–1192, 2011.
- 690 Fick, S. E. and Hijmans, R. J.: WorldClim 2: new 1-km spatial resolution climate surfaces for global land areas, *International journal of climatology*, 37, 4302–4315, 2017.
- Fotso-Nguemo, T. C., Vondou, D. A., Pokam, W. M., Djomou, Z. Y., Diallo, I., Haensler, A., Tchotchou, L. A. D., Kamsu-Tamo, P. H., Gaye, A. T., and Tchawoua, C.: On the added value of the regional climate model REMO in the assessment of climate change signal over Central Africa, *Climate Dynamics*, 49, 3813–3838, 2017.
- 695 Fowler, H. J., Blenkinsop, S., and Tebaldi, C.: Linking climate change modelling to impacts studies: recent advances in downscaling techniques for hydrological modelling, *International Journal of Climatology: A Journal of the Royal Meteorological Society*, 27, 1547–1578, 2007.
- Frei, C., Christensen, J. H., Déqué, M., Jacob, D., Jones, R. G., and Vidale, P. L.: Daily precipitation statistics in regional climate models: Evaluation and intercomparison for the European Alps, *Journal of Geophysical Research: Atmospheres*, 108, 2003.
- 700 Funk, C., Peterson, P., Landsfeld, M., Pedreros, D., Verdin, J., Shukla, S., Husak, G., Rowland, J., Harrison, L., Hoell, A., et al.: The climate hazards infrared precipitation with stations—a new environmental record for monitoring extremes, *Scientific data*, 2, 1–21, 2015.
- Galea, D., Ma, H.-Y., Wu, W.-Y., and Kobayashi, D.: Deep Learning Image Segmentation for Atmospheric Rivers, *Artificial Intelligence for the Earth Systems*, 3, 230048, 2024.
- Gardoll, S. and Boucher, O.: Classification of tropical cyclone containing images using a convolutional neural network: Performance and sensitivity to the learning dataset, *Geoscientific Model Development*, 15, 7051–7073, 2022.
- 705 Giorgi, F. and Gutowski Jr, W. J.: Regional dynamical downscaling and the CORDEX initiative, *Annual review of environment and resources*, 40, 467–490, 2015.
- Giot, O., Termonia, P., Degrauwe, D., De Troch, R., Caluwaerts, S., Smet, G., Berckmans, J., Deckmyn, A., De Cruz, L., De Meutter, P., et al.: Validation of the ALARO-0 model within the EURO-CORDEX framework, *Geoscientific Model Development*, 9, 1143–1152, 2016.
- 710 Harder, P., Yang, Q., Ramesh, V., Sattigeri, P., Hernandez-Garcia, A., Watson, C., Szwarcman, D., and Rolnick, D.: Generating physically-consistent high-resolution climate data with hard-constrained neural networks, 2022.
- Harder, P., Hernandez-Garcia, A., Ramesh, V., Yang, Q., Sattigeri, P., Szwarcman, D., Watson, C., and Rolnick, D.: Hard-Constrained Deep Learning for Climate Downscaling, *Journal of Machine Learning Research*, 24, 1–40, 2023.
- Hess, P., Drüke, M., Petri, S., Strnad, F. M., and Boers, N.: Physically constrained generative adversarial networks for improving precipitation fields from Earth system models, *Nature Machine Intelligence*, 4, 828–839, 2022.
- 715

- Hewitson, B., Daron, J., Crane, R., Zermoglio, M., and Jack, C.: Interrogating empirical-statistical downscaling, *Climatic change*, 122, 539–554, 2014.
- Hodson, T. O.: Root-mean-square error (RMSE) or mean absolute error (MAE): When to use them or not, *Geoscientific Model Development*, 15, 5481–5487, 2022.
- 720 Hong, S.-Y. and Kanamitsu, M.: Dynamical downscaling: Fundamental issues from an NWP point of view and recommendations, *Asia-Pacific Journal of Atmospheric Sciences*, 50, 83–104, 2014.
- Jacob, D. and Podzun, R.: Sensitivity studies with the regional climate model REMO, *Meteorology and atmospheric physics*, 63, 119–129, 1997.
- Jacob, D., Elizalde, A., Haensler, A., Hagemann, S., Kumar, P., Podzun, R., Rechid, D., Remedio, A. R., Saeed, F., Sieck, K., et al.: Assessing  
725 the transferability of the regional climate model REMO to different coordinated regional climate downscaling experiment (CORDEX) regions, *Atmosphere*, 3, 181–199, 2012.
- Jacob, D., Petersen, J., Eggert, B., Alias, A., Christensen, O. B., Bouwer, L. M., Braun, A., Colette, A., Déqué, M., Georgievski, G., et al.: EURO-CORDEX: New high-resolution climate change projections for European impact research, *Regional Environmental Change*, 14, 563–578, 2014.
- 730 Juvet, G. and Cordonnier, G.: Ice-flow model emulator based on physics-informed deep learning, *Journal of Glaciology*, pp. 1–15, 2023.
- Kendon, E., Roberts, N., Fowler, H., Roberts, M., Chan, S., and Senior, C.: Heavier summer downpours with climate change revealed by weather forecast resolution model. *Nat. Climate Change*, 4, 570–576, 2014.
- Kikstra, J. S., Nicholls, Z. R., Smith, C. J., Lewis, J., Lamboll, R. D., Byers, E., Sandstad, M., Meinshausen, M., Gidden, M. J., Rogelj, J., et al.: The IPCC Sixth Assessment Report WGIII climate assessment of mitigation pathways: from emissions to global temperatures,  
735 *Geoscientific Model Development*, 15, 9075–9109, 2022.
- Kirschbaum, D. B., Adler, R., Hong, Y., Hill, S., and Lerner-Lam, A.: A global landslide catalog for hazard applications: method, results, and limitations, *Natural Hazards*, 52, 561–575, 2010.
- Kjellström, E., Nikulin, G., Hansson, U., Strandberg, G., Ullerstig, A., Willén, U., and Wyser, K.: 21st century changes in the European climate: uncertainties derived from an ensemble of regional climate model simulations, *Tellus A: Dynamic Meteorology and Oceanography*,  
740 63, 24–40, 2011.
- Klok, E. and Klein Tank, A.: Updated and extended European dataset of daily weather observations, *International Journal of Climatology*, 28, 2081–2095, 2008.
- Kotlarski, S., Keuler, K., Christensen, O. B., Colette, A., Déqué, M., Gobiet, A., Goergen, K., Jacob, D., Lüthi, D., Van Meijgaard, E., et al.: Regional climate modeling on European scales: a joint standard evaluation of the EURO-CORDEX RCM ensemble, *Geoscientific Model  
745 Development*, 7, 1297–1333, 2014.
- Kurth, T., Treichler, S., Romero, J., Mudigonda, M., Luehr, N., Phillips, E., Mahesh, A., Matheson, M., Deslippe, J., Fatica, M., et al.: Exascale deep learning for climate analytics, in: SC18: International conference for high performance computing, networking, storage and analysis, pp. 649–660, IEEE, 2018.
- Laflamme, E. M., Linder, E., and Pan, Y.: Statistical downscaling of regional climate model output to achieve projections of precipitation  
750 extremes, *Weather and climate extremes*, 12, 15–23, 2016.
- Lange, S.: Trend-preserving bias adjustment and statistical downscaling with ISIMIP3BASD (v1. 0), *Geoscientific Model Development*, 12, 3055–3070, 2019.



- Leinonen, J., Nerini, D., and Berne, A.: Stochastic super-resolution for downscaling time-evolving atmospheric fields with a generative adversarial network, *IEEE Transactions on Geoscience and Remote Sensing*, 59, 7211–7223, 2020.
- 755 Lenz, C.-J., Früh, B., and Adalatpanah, F. D.: Is there potential added value in COSMO–CLM forced by ERA reanalysis data?, *Climate Dynamics*, 49, 4061–4074, 2017.
- Li, L., Bisht, G., and Leung, L. R.: Spatial heterogeneity effects on land surface modeling of water and energy partitioning, *Geoscientific Model Development*, 15, 5489–5510, 2022.
- Lundquist, J., Hughes, M., Gutmann, E., and Kapnick, S.: Our skill in modeling mountain rain and snow is bypassing the skill of our  
760 observational networks, *Bulletin of the American Meteorological Society*, 100, 2473–2490, 2019.
- Maraun, D. and Widmann, M.: *Statistical downscaling and bias correction for climate research*, Cambridge University Press, 2018.
- Maraun, D., Widmann, M., Gutiérrez, J. M., Kotlarski, S., Chandler, R. E., Hertig, E., Wibig, J., Huth, R., and Wilcke, R. A.: VALUE: A framework to validate downscaling approaches for climate change studies, *Earth’s Future*, 3, 1–14, 2015.
- Meredith, E. P., Rust, H. W., and Ulbrich, U.: A classification algorithm for selective dynamical downscaling of precipitation extremes,  
765 *Hydrology and Earth System Sciences*, 22, 4183–4200, 2018.
- Mitchell, T. D. and Hulme, M.: Predicting regional climate change: living with uncertainty, *Progress in Physical Geography*, 23, 57–78, 1999.
- Muttaqien, F. H., Rahadiani, L., and Latifah, A. L.: Downscaling for Climate Data in Indonesia Using Image-to-Image Translation Approach, in: *2021 International Conference on Advanced Computer Science and Information Systems (ICACSIS)*, pp. 1–8, IEEE, 2021.
- Naddaf, M.: Climate change is costing trillions-and low-income countries are paying the price., *Nature*, 2022.
- 770 Panitz, H.-J., Dosio, A., Büchner, M., Lüthi, D., and Keuler, K.: COSMO-CLM (CCLM) climate simulations over CORDEX-Africa domain: analysis of the ERA-Interim driven simulations at 0.44 and 0.22 resolution, *Climate dynamics*, 42, 3015–3038, 2014.
- Qiu, Y., Feng, J., Yan, Z., and Wang, J.: HCPD-CA: high-resolution climate projection dataset in central Asia, *Earth System Science Data*, 14, 2195–2208, 2022.
- Racah, E., Beckham, C., Maharaj, T., Ebrahimi Kahou, S., Prabhat, M., and Pal, C.: Extremeweather: A large-scale climate dataset for semi-  
775 supervised detection, localization, and understanding of extreme weather events, *Advances in neural information processing systems*, 30, 2017.
- Rampal, N., Hobeichi, S., Gibson, P. B., Baño-Medina, J., Abramowitz, G., Beucler, T., González-Abad, J., Chapman, W., Harder, P., and Gutiérrez, J. M.: Enhancing Regional Climate Downscaling through Advances in Machine Learning, *Artificial Intelligence for the Earth Systems*, 3, 230066, 2024.
- 780 Randall, D. A., Wood, R. A., Bony, S., Colman, R., Fichet, T., Fyfe, J., Kattsov, V., Pitman, A., Shukla, J., Srinivasan, J., et al.: Climate models and their evaluation, in: *Climate change 2007: The physical science basis. Contribution of Working Group I to the Fourth Assessment Report of the IPCC (FAR)*, pp. 589–662, Cambridge University Press, 2007.
- Rasp, S. and Lerch, S.: Neural networks for postprocessing ensemble weather forecasts, *Monthly Weather Review*, 146, 3885–3900, 2018.
- Reichstein, M., Camps-Valls, G., Stevens, B., Jung, M., Denzler, J., Carvalhais, N., and Prabhat, f.: Deep learning and process understanding  
785 for data-driven Earth system science, *Nature*, 566, 195–204, 2019.
- Reyer, C. P., Otto, I. M., Adams, S., Albrecht, T., Baarsch, F., Cartsburg, M., Coumou, D., Eden, A., Ludi, E., Marcus, R., et al.: Climate change impacts in Central Asia and their implications for development, *Regional Environmental Change*, 17, 1639–1650, 2017.
- Riahi, K., Van Vuuren, D. P., Kriegler, E., Edmonds, J., O’neill, B. C., Fujimori, S., Bauer, N., Calvin, K., Dellink, R., Fricko, O., et al.: The shared socioeconomic pathways and their energy, land use, and greenhouse gas emissions implications: an overview, *Global environmental  
790 change*, 42, 153–168, 2017.

- Rockel, B. and Geyer, B.: The performance of the regional climate model CLM in different climate regions, as simulated in a transient climate change experiment, *Climate Dynamics*, 31, 713–728, 2008.
- Rummukainen, M.: State-of-the-art with regional climate models, *Wiley Interdisciplinary Reviews: Climate Change*, 1, 82–96, 2010.
- 795 Russo, E., Kirchner, I., Pfahl, S., Schaap, M., and Cubasch, U.: Sensitivity studies with the regional climate model COSMO-CLM 5.0 over the CORDEX Central Asia Domain, *Geoscientific Model Development*, 12, 5229–5249, 2019.
- Russo, E., Sørland, S. L., Kirchner, I., Schaap, M., Raible, C. C., and Cubasch, U.: Exploring the parameter space of the COSMO-CLM v5.0 regional climate model for the Central Asia CORDEX domain, *Geoscientific Model Development*, 13, 5779–5797, 2020.
- Russo, E., Fallah, B., Ludwig, P., Karremann, M., and Raible, C. C.: The long-standing dilemma of European summer temperatures at the mid-Holocene and other considerations on learning from the past for the future using a regional climate model, *Climate of the Past Discussions*, 2021, 1–27, 2021.
- 800 Serifi, A., Günther, T., and Ban, N.: Spatio-temporal downscaling of climate data using convolutional and error-predicting neural networks, *Frontiers in Climate*, 3, 656 479, 2021.
- Smith, J. A., Baeck, M. L., Villarini, G., and Krajewski, W. F.: The hydrology and hydrometeorology of flooding in the Delaware River Basin, *Journal of Hydrometeorology*, 11, 841–859, 2010.
- 805 Sørland, S. L., Schär, C., Lüthi, D., and Kjellström, E.: Bias patterns and climate change signals in GCM-RCM model chains, *Environmental Research Letters*, 13, 074 017, 2018.
- Sørland, S. L., Brogli, R., Pothapakula, P. K., Russo, E., Van de Walle, J., Ahrens, B., Anders, I., Bucchignani, E., Davin, E. L., Demory, M.-E., et al.: COSMO-CLM regional climate simulations in the Coordinated Regional Climate Downscaling Experiment (CORDEX) framework: a review, *Geoscientific Model Development*, 14, 5125–5154, 2021.
- 810 Stengel, K., Glaws, A., Hettinger, D., and King, R. N.: Adversarial super-resolution of climatological wind and solar data, *Proceedings of the National Academy of Sciences*, 117, 16 805–16 815, 2020.
- Sun, L. and Lan, Y.: Statistical downscaling of daily temperature and precipitation over China using deep learning neural models: Localization and comparison with other methods, *International Journal of Climatology*, 41, 1128–1147, 2021.
- Taylor, K. E., Stouffer, R. J., and Meehl, G. A.: An overview of CMIP5 and the experiment design, *Bulletin of the American meteorological Society*, 93, 485–498, 2012.
- 815 Torma, C., Giorgi, F., and Coppola, E.: Added value of regional climate modeling over areas characterized by complex terrain—Precipitation over the Alps, *Journal of Geophysical Research: Atmospheres*, 120, 3957–3972, 2015.
- Volosciuk, C., Maraun, D., Vrac, M., and Widmann, M.: A combined statistical bias correction and stochastic downscaling method for precipitation, *Hydrology and Earth System Sciences*, 21, 1693–1719, 2017.
- 820 Wang, D., Menz, C., Simon, T., Simmer, C., and Ohlwein, C.: Regional dynamical downscaling with CCLM over East Asia, *Meteorology and Atmospheric Physics*, 121, 39–53, 2013.
- Wang, X., Otto, M., and Scherer, D.: Atmospheric triggering conditions and climatic disposition of landslides in Kyrgyzstan and Tajikistan at the beginning of the 21st century, *Natural Hazards and Earth System Sciences*, 21, 2125–2144, 2021.
- Watson-Parris, D., Rao, Y., Olivié, D., Seland, Ø., Nowack, P., Camps-Valls, G., Stier, P., Bouabid, S., Dewey, M., Fons, E., et al.: ClimateBench v1. 0: A benchmark for data-driven climate projections, *Journal of Advances in Modeling Earth Systems*, 14, e2021MS002 954, 2022.
- 825 Xu, P., Wang, L., and Ming, J.: Central Asian precipitation extremes affected by an intraseasonal planetary wave pattern, *Journal of Climate*, 35, 2603–2616, 2022.

- Xu, Z., Han, Y., Tam, C.-Y., Yang, Z.-L., and Fu, C.: Bias-corrected CMIP6 global dataset for dynamical downscaling of the historical and  
830 future climate (1979–2100), *Scientific Data*, 8, 293, 2021.
- Yan, Y., You, Q., Wu, F., Pepin, N., and Kang, S.: Surface mean temperature from the observational stations and multiple reanalyses over the  
Tibetan Plateau, *Climate Dynamics*, 55, 2405–2419, 2020.
- Yang, D., Liu, S., Hu, Y., Liu, X., Xie, J., and Zhao, L.: Predictor selection for CNN-based statistical downscaling of monthly precipitation,  
*Advances in Atmospheric Sciences*, 40, 1117–1131, 2023.
- 835 Yatagai, A., Kitoh, A., Kamiguchi, K., Arakawa, O., Kawamoto, H., Tahashima, H., Watanabe, T., Kuboto, J., Taneguchi, M., and Kanae, S.:  
Asian precipitation–highly resolved observational data integration towards evaluation of the water resources, in: Presentation at PHERPP  
meeting, WMO, Geneva December, 2007.
- Zhu, X. X., Tuia, D., Mou, L., Xia, G.-S., Zhang, L., Xu, F., and Fraundorfer, F.: Deep learning in remote sensing: A comprehensive review  
and list of resources, *IEEE geoscience and remote sensing magazine*, 5, 8–36, 2017.
